# Supplementary material for: Enantiodivergent routes to (+) and (−)-novioses from (−)-pantolactone
Source: Royal Society of Chemistry journal article supplement (doi:10.1039/c3ra42891e), 2013-01-01

# Enantiodivergent routes to (+) and (-)-novioses from (-)-pantolactone

Rajesh B. M., Madhuri V. Shinde, M. Kannan, Gujjary Srinivas, Javed Iqbal and D. Srinivasa Reddy\*

\*Corresponding author:

Dr. D. Srinivasa Reddy

National Chemical Laboratory (CSIR, India),

Division of Organic Chemistry,

Dr. Homi Bhabha Road,

Pune 411008, Maharashtra,

India.

E-mail: ds.reddy@ncl.res.in

Tel. +91 20 25902445

Fax. +91 20 25902629

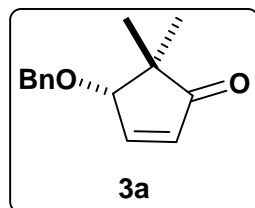

SE-996-MKM-016 1H NMR  
AQ-03

AN.No:RE 8787/595  
Analyst: Dipayan Paul  
Date: 16 July 2007

Analytical Research, Discovery Research, DRL  
Instrument : Mercury Plus (Varian 400MHz)  
Date & Time : Fri Jul 28 17:38:28 GMT 2007  
Recorded By : Vijay .S

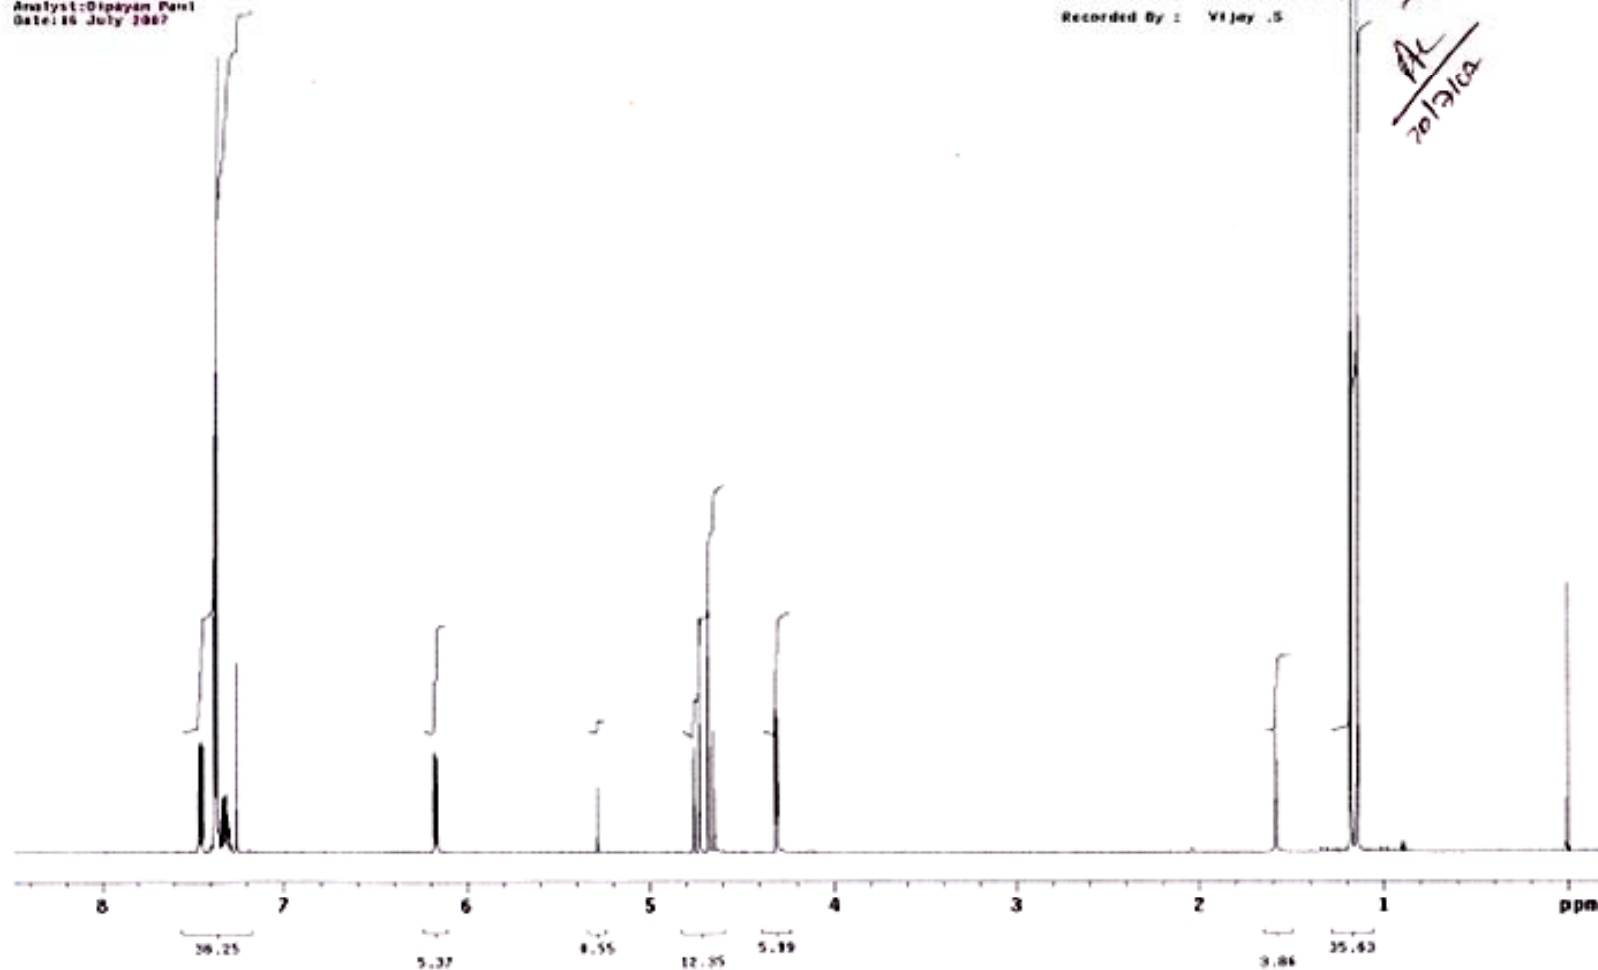

$^1\text{H}$  NMR spectrum of 3a in  $\text{CDCl}_3$

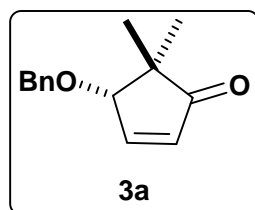

DR-100-MEN-016 H<sub>2</sub>O CDCl<sub>3</sub>  
AQ-03

AR.No.: GE0787/d94  
Analyst: Vijay  
Date: 17 July 2007

Pulse Sequence: zgpg30

Analytical Research, Discovery Research, DRI  
Instrument : Gemini-3000 (Varian 200MHz)  
Date & Time : Wed Jul 18 10:05:05 PM 2007  
Recorded By : Vijay .S

*Handwritten:* 18/7/07

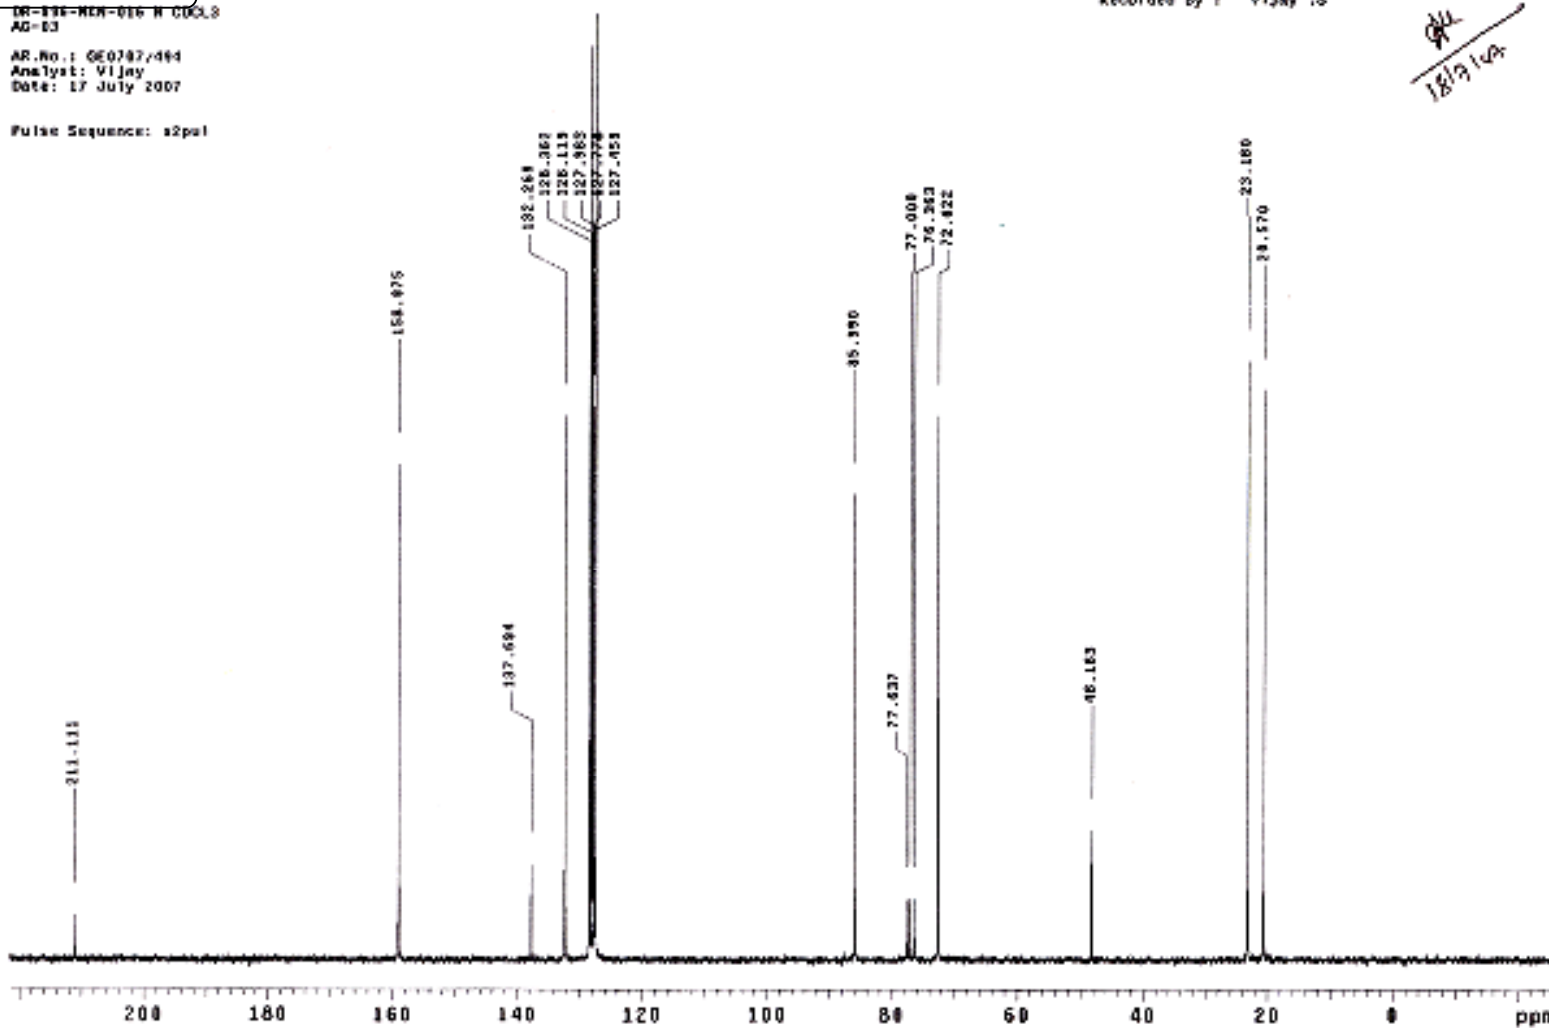

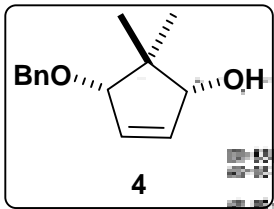

MS-859-883-1 (M 20 0011)  
MS-85  
anap (MS-854, 0058)  
(Analytical) MS-854, 0058

Analytical Research, Discovery Research, 90,  
Infrared : Mercury Plus (Polaris 4000)  
Date & Time : Thu Jun 20 22:55:11 GMT 1999  
Acquired By : Anap, J

MS-854, 0058

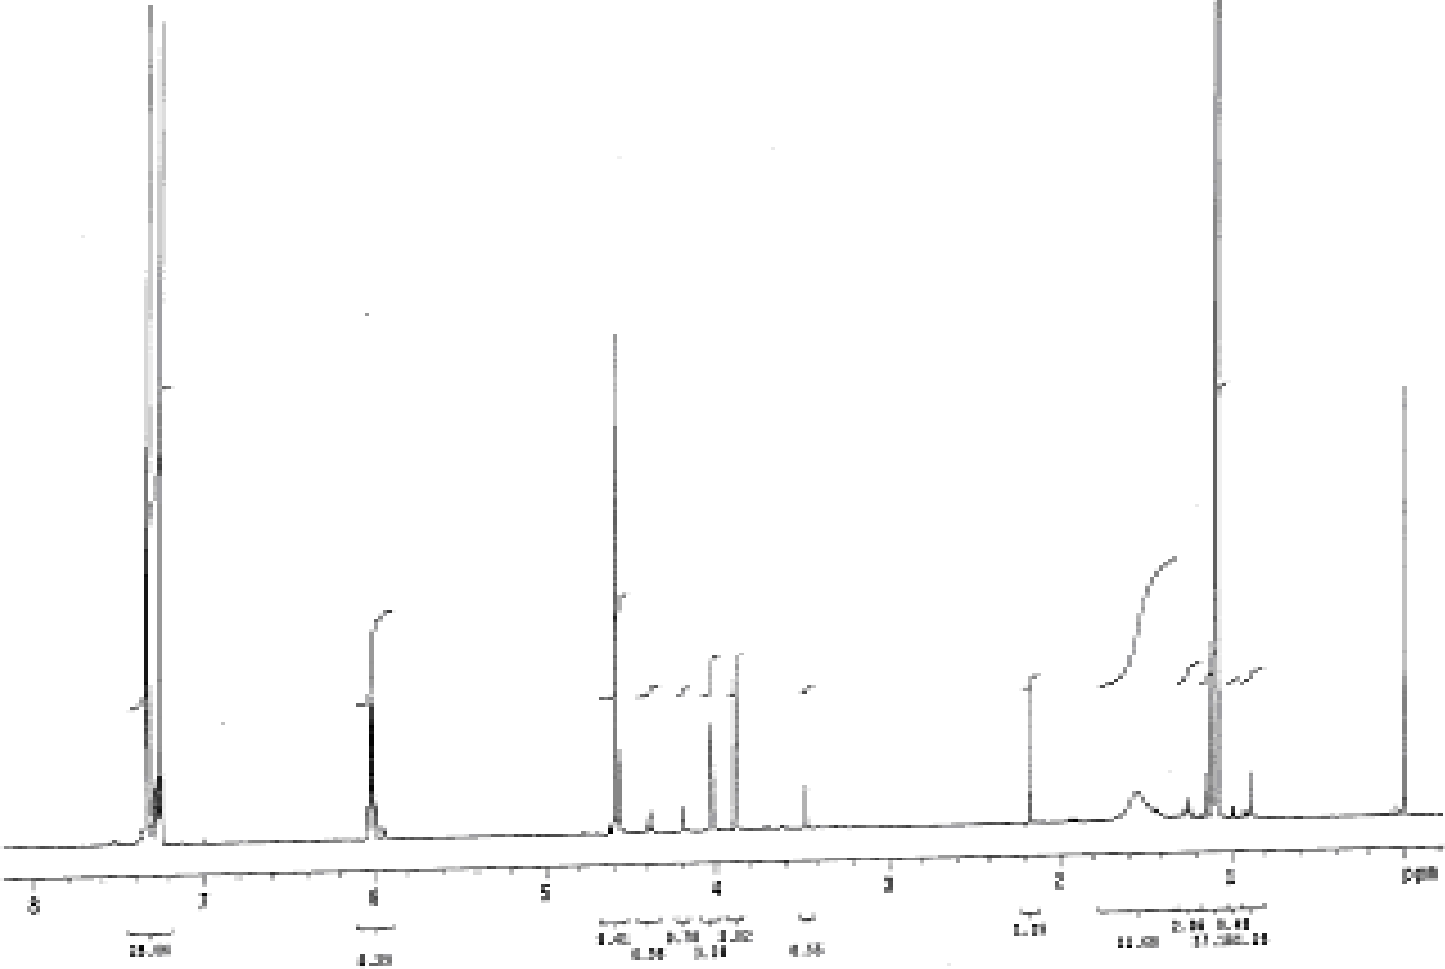

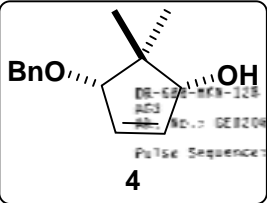

DE-500-800-128 in CDCl<sub>3</sub>  
AQ3  
No.: GE0204-839  
Pulse Sequence: gzgpg1

Instrument : Gemini-2000 (200MHz)  
Date & Time : Thu Feb 16 13:41:51 GMT 2006  
Recorded By : Marioj

~~76100108~~

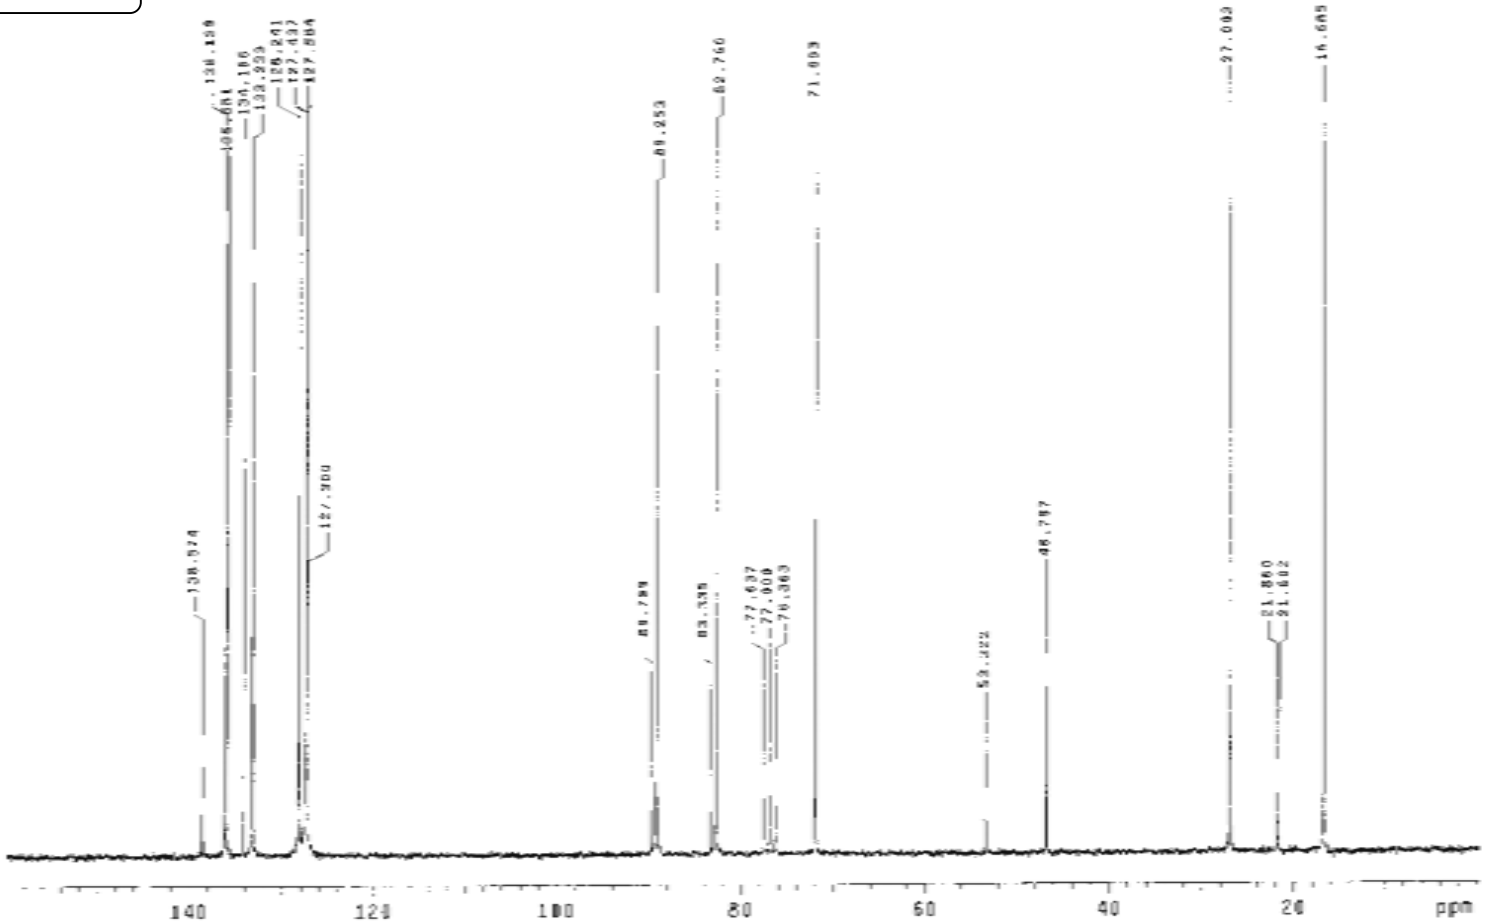

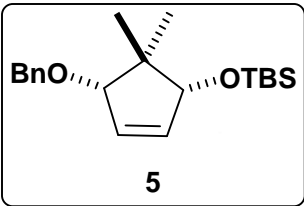

600-MHz 1H NMR IN CDCl<sub>3</sub>  
AQ-7  
AR.No:HE0206/455  
Pulse Sequence: zgpg30

Instrument : Mercury Plus (Varian 400MHz)  
Date & Time : Thu Feb 10 14:07:49 Oct 2006  
Recorded By : Sreekanth Sharma

16/12/16

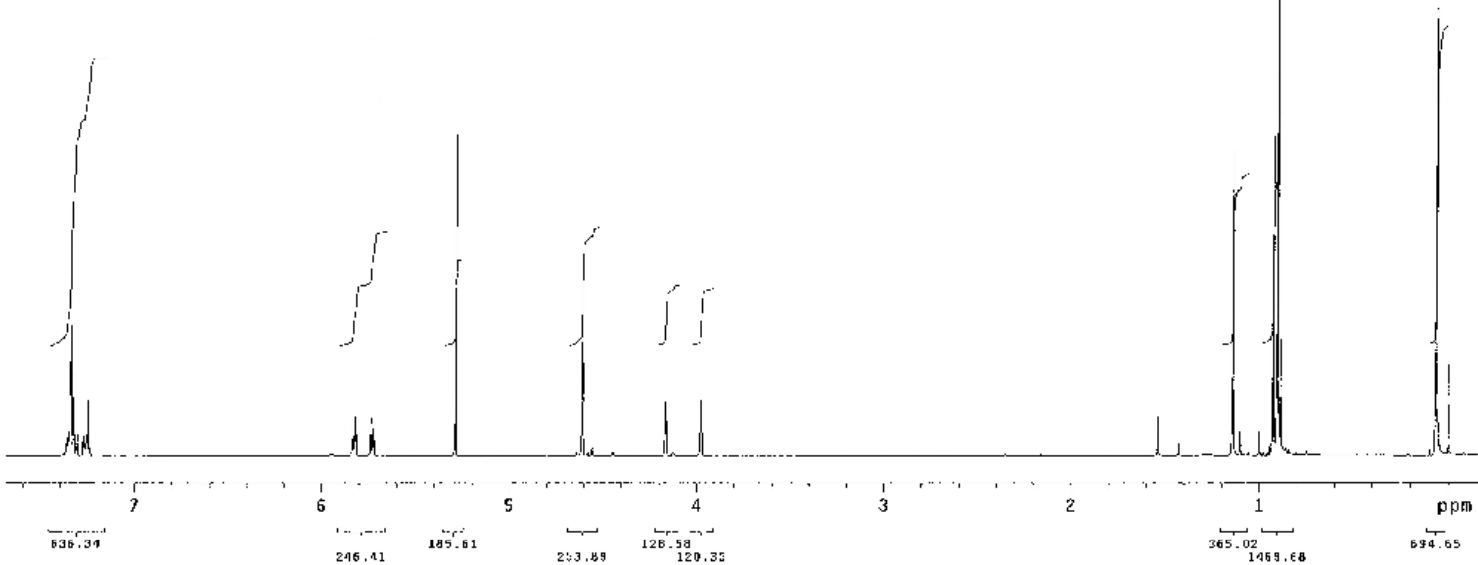

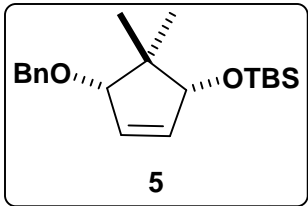

BMR-JI-535 in CDCl<sub>3</sub>  
A6-07  
AR. No.: GE0206-729  
Pulse Sequence: zgpg30

Instrument : Gemini-2000 (200MHz)  
Date & Time : Fri Feb 17 09:54:48 GMT 2006  
Recorded By : Nandj

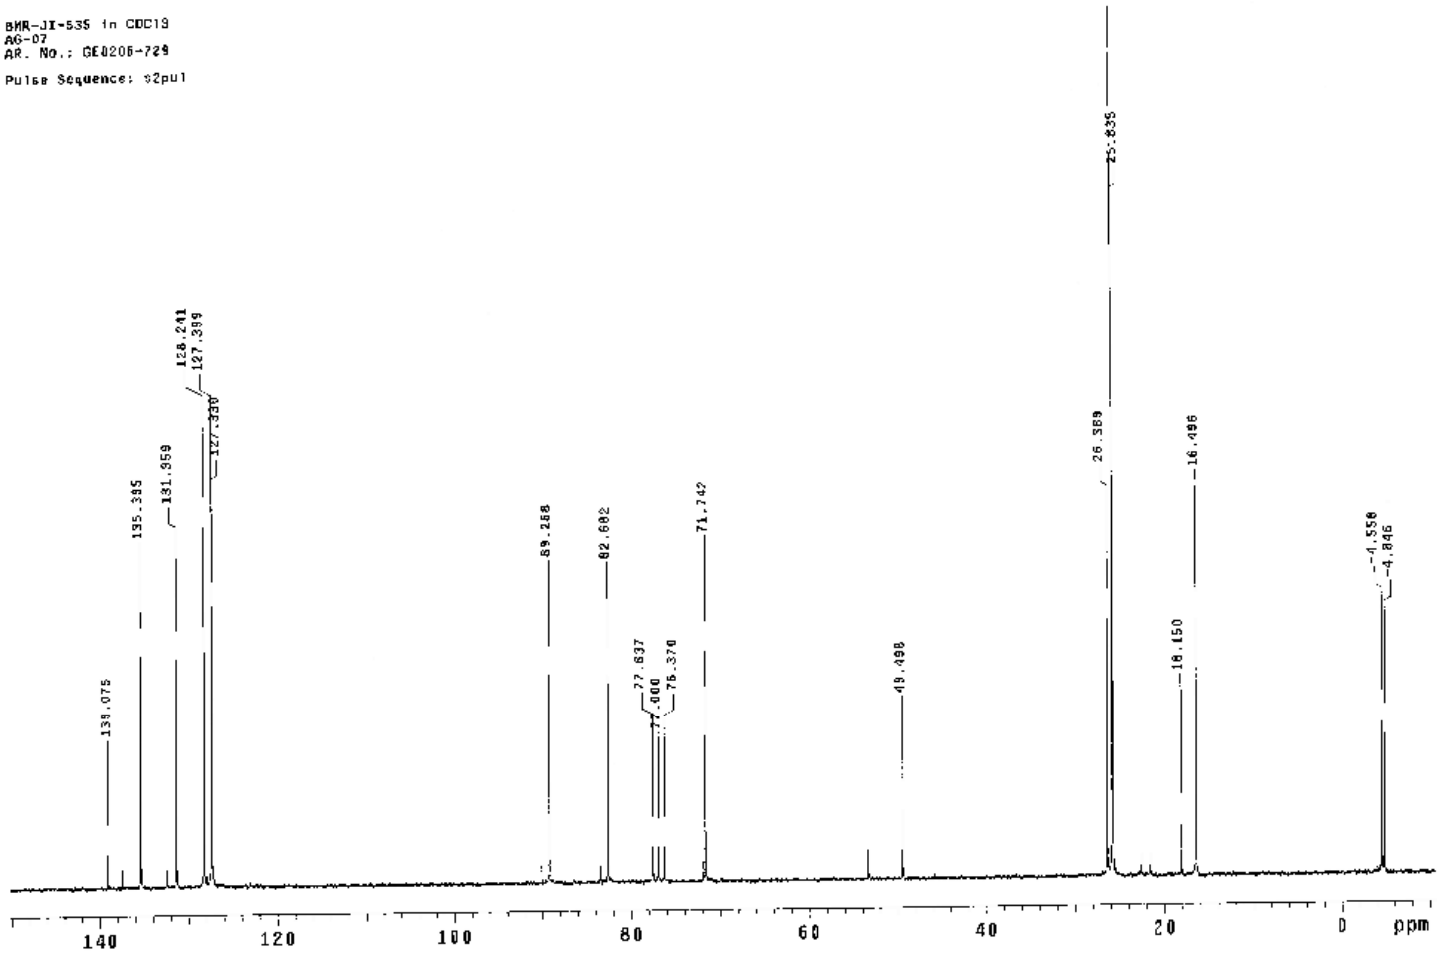

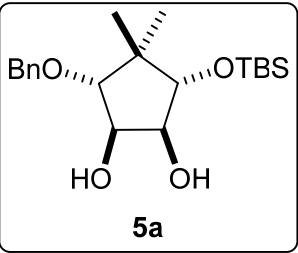

DR-600-MKN-130 in CDCl<sub>3</sub>  
AG-03  
AR.No.: ME0205/508  
Pulse Sequence: zgpg30

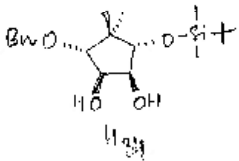

Instrument : Mercury Plus (Varian 400MHz)  
Date & Time : Fri Feb 17 15:03:54 GMT 2006  
Recorded By : Lakshmi Kumar  
17/02/06

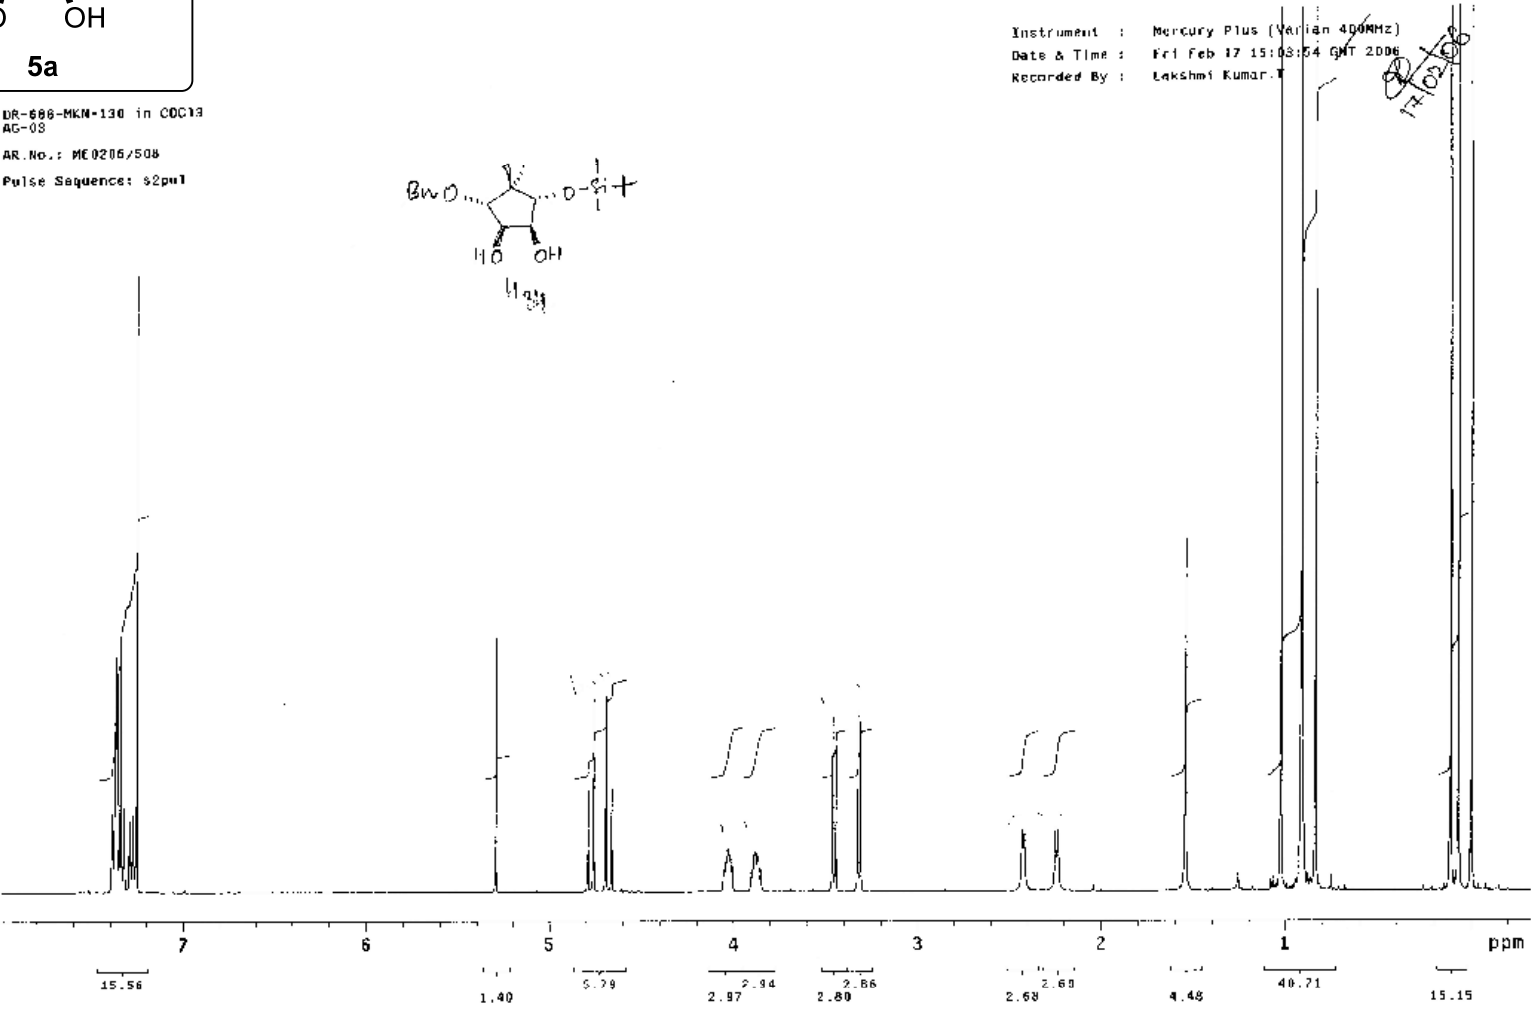



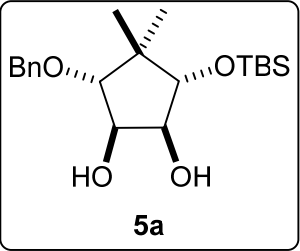

DR-688-MKN-130 1n CDCl3  
AG-03  
AR.No.: GE0306/74  
Pulse Sequence: s2pu1

Instrument : Gemini-2000 (200MHz)  
Date & Time : Thu Mar 2 13:22:33 PM 2006  
Recorded By : Lakshmi Kumar.T

2/03/06

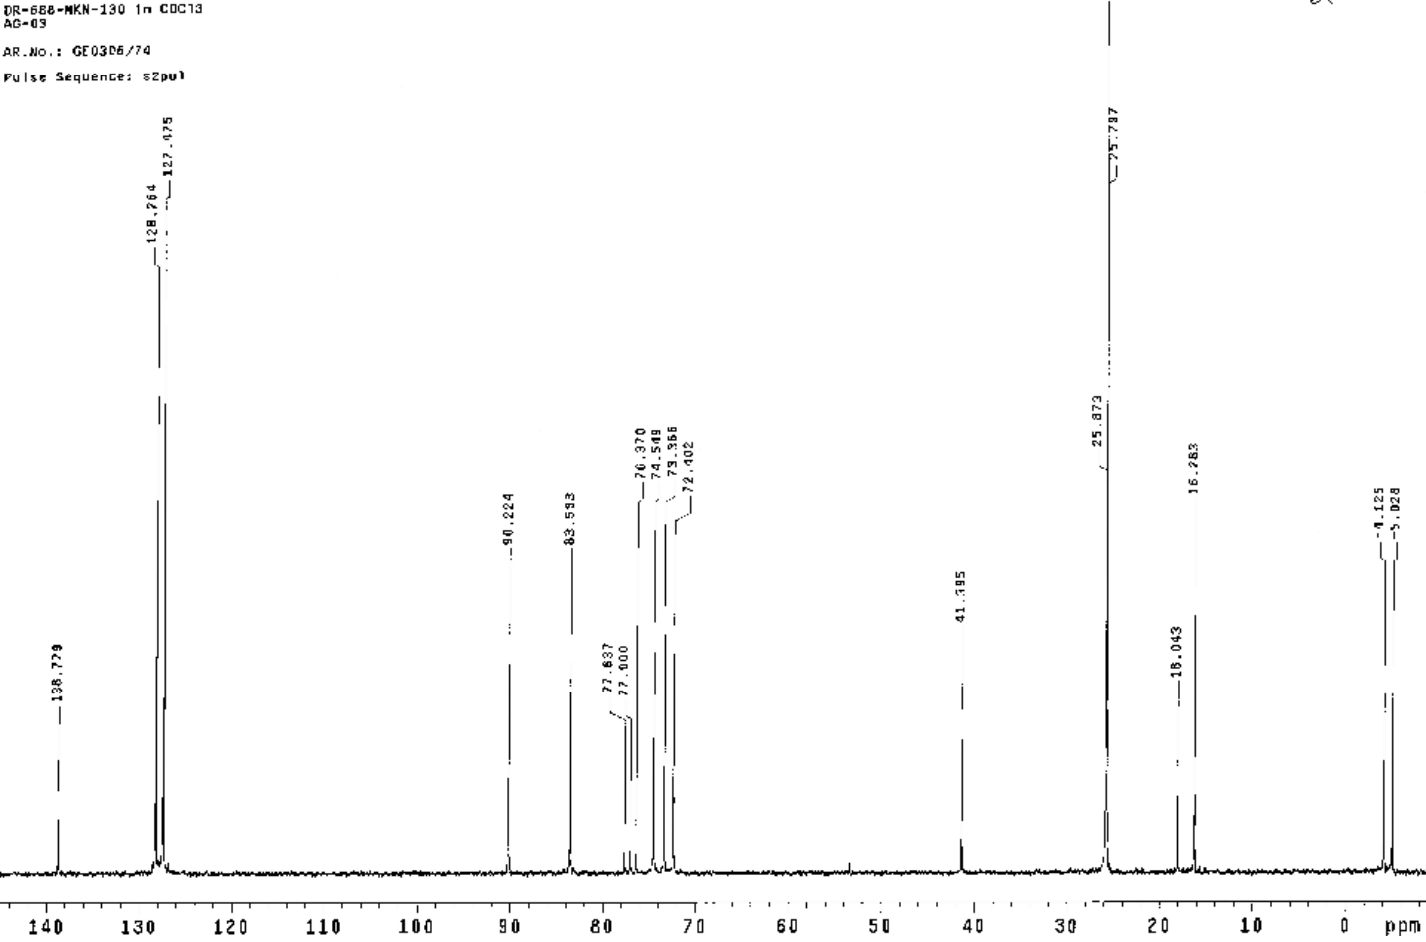

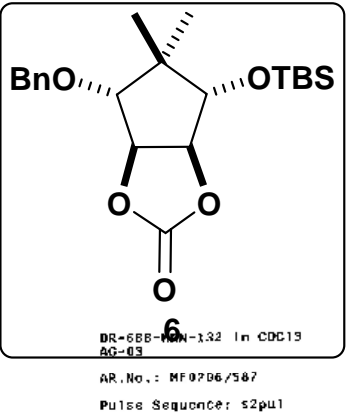

Instrument : Mercury Plus (Varian 400MHz)  
Date & Time : Tue Feb 21 10:12:04 GMT 2006  
Recorded By : Lakshmi Kumar.T

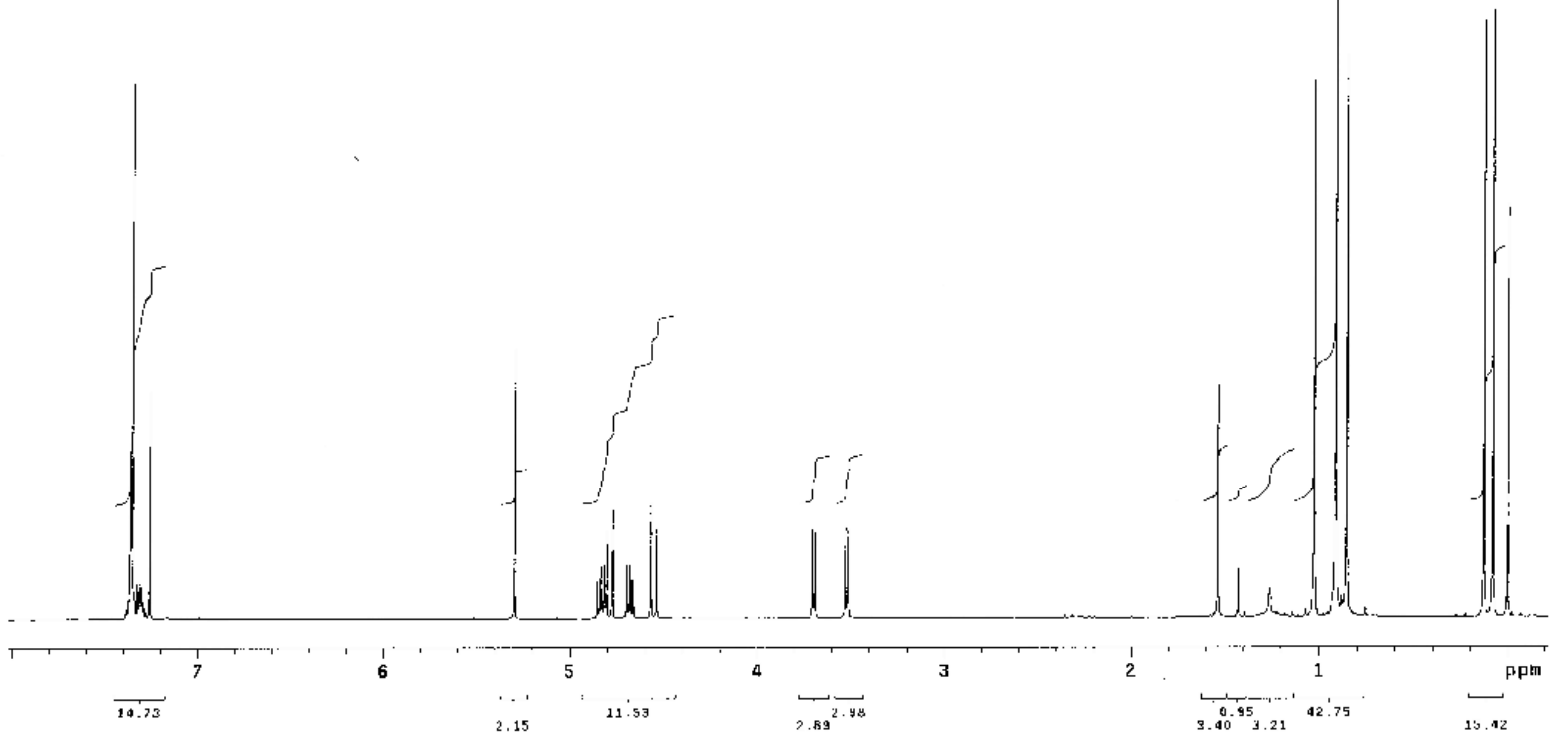

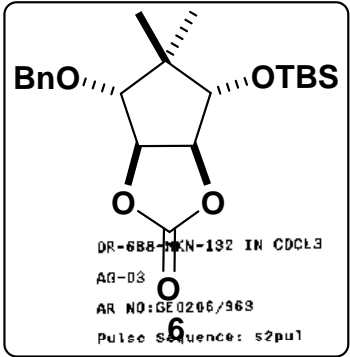

Instrument : Gemini-2000 (200MHz)  
Date & Time : Thu Feb 23 16:11:50 GMT 2006  
Recorded By : Hanoj

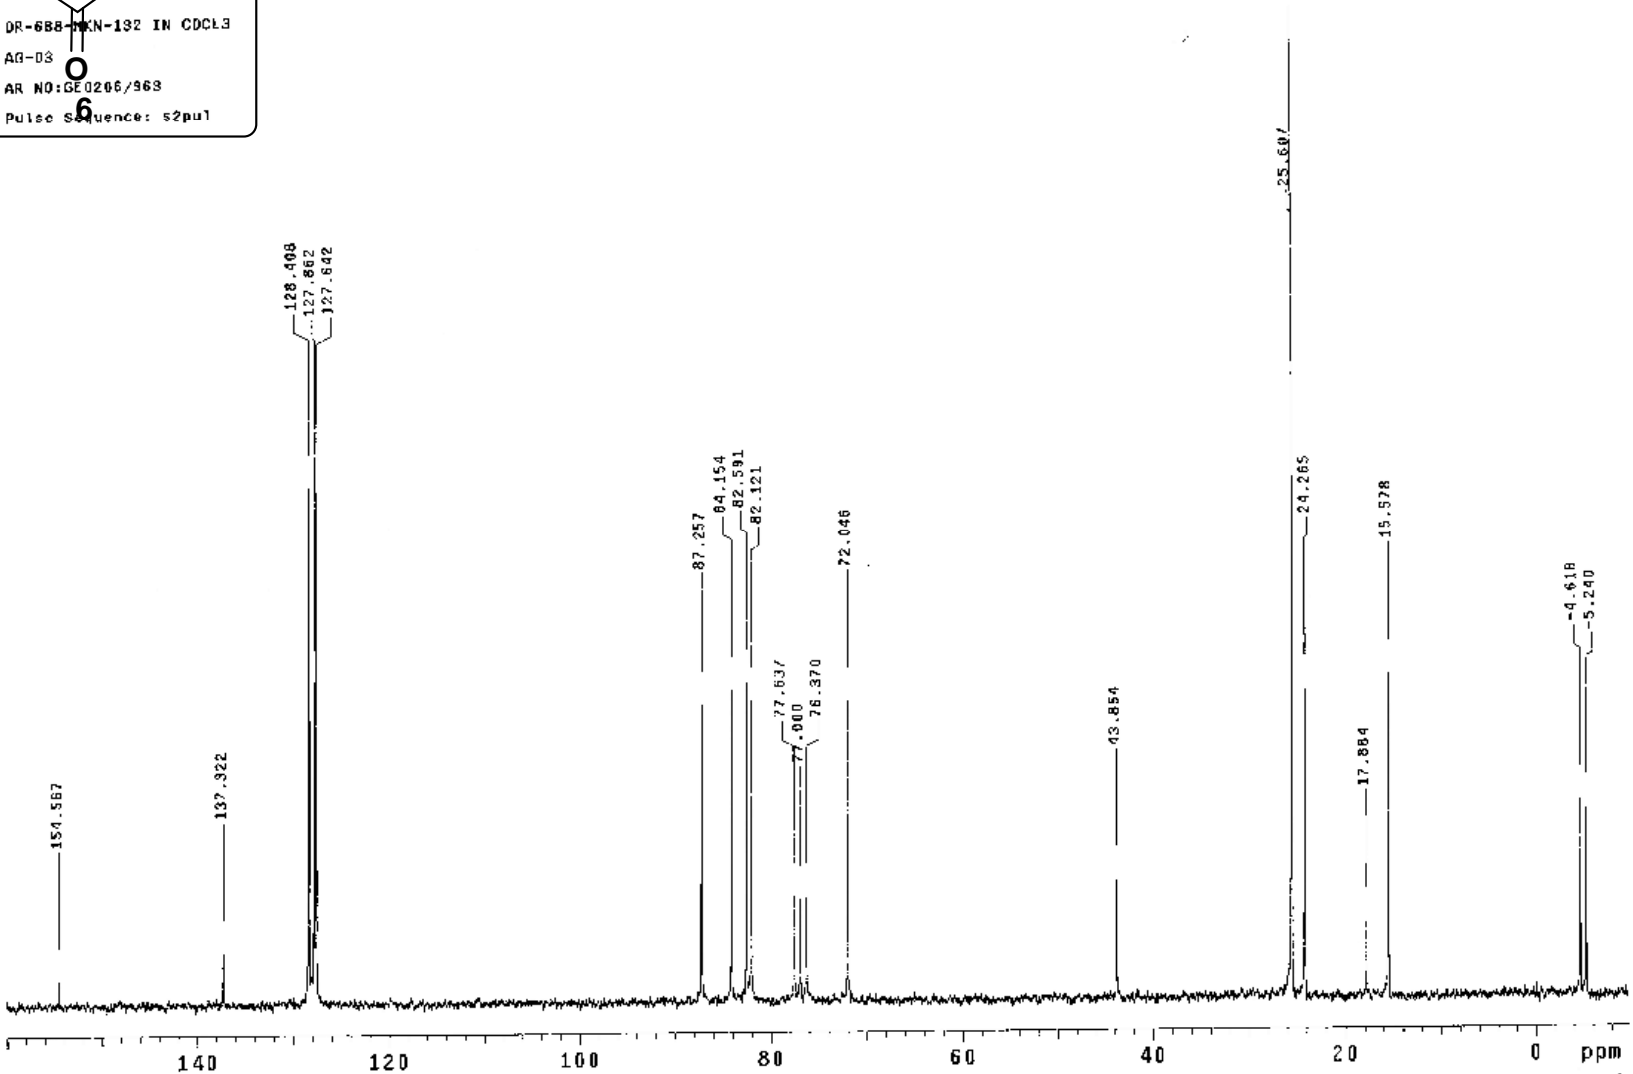

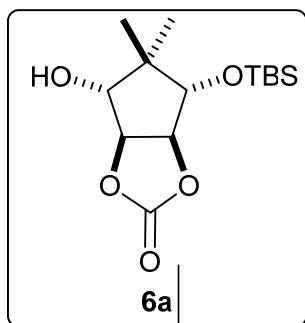

DMR-JI-580 in CDCl<sub>3</sub>  
AG-07  
AR.NO.: ME0706/494  
Pulse Sequence: zgpg30

Instrument : Mercury Plus (Varian 400MHz)  
Date & Time : Tue Jul 11 17:08:52 GMT 2006  
Recorded By : Lakshmi Kumar.T

11/05/06

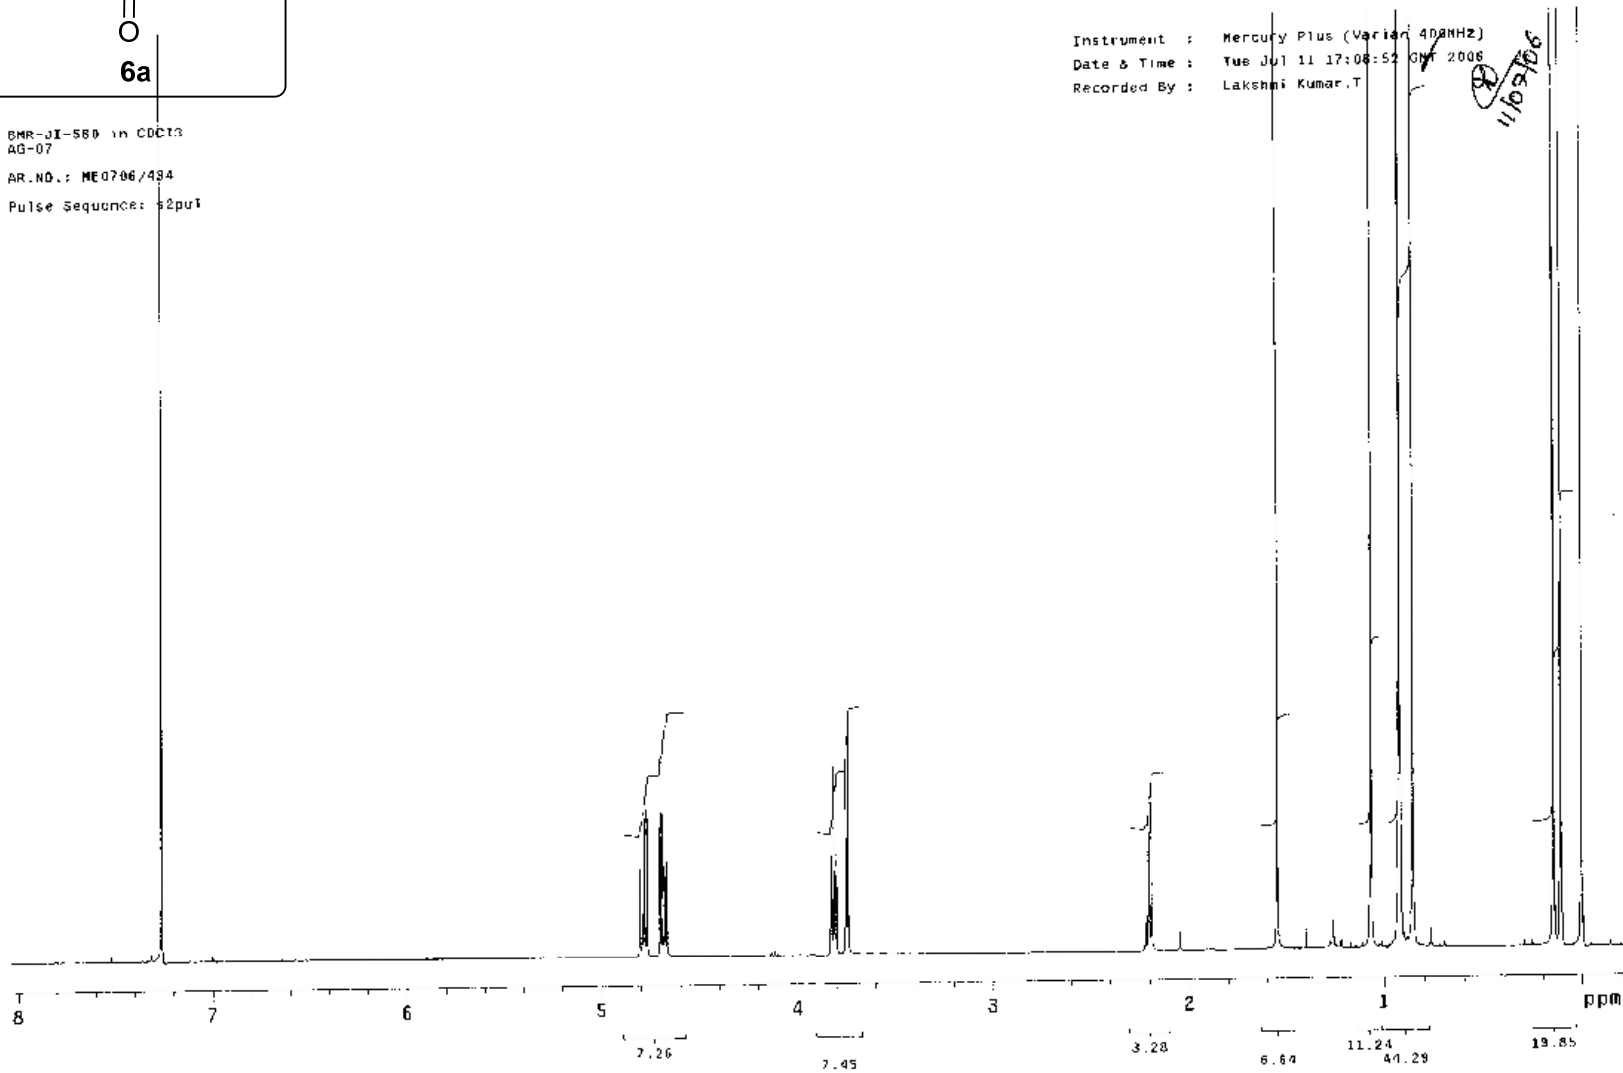

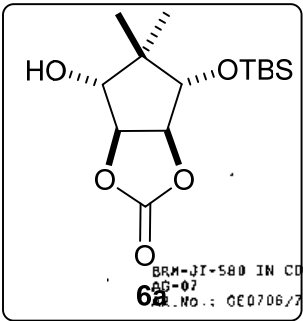

Instrument : Gemini-2000 (200MHz)  
Date & Time : Sat Jul 22 16:02:16 GMT 2005  
Recorded By : Manoj

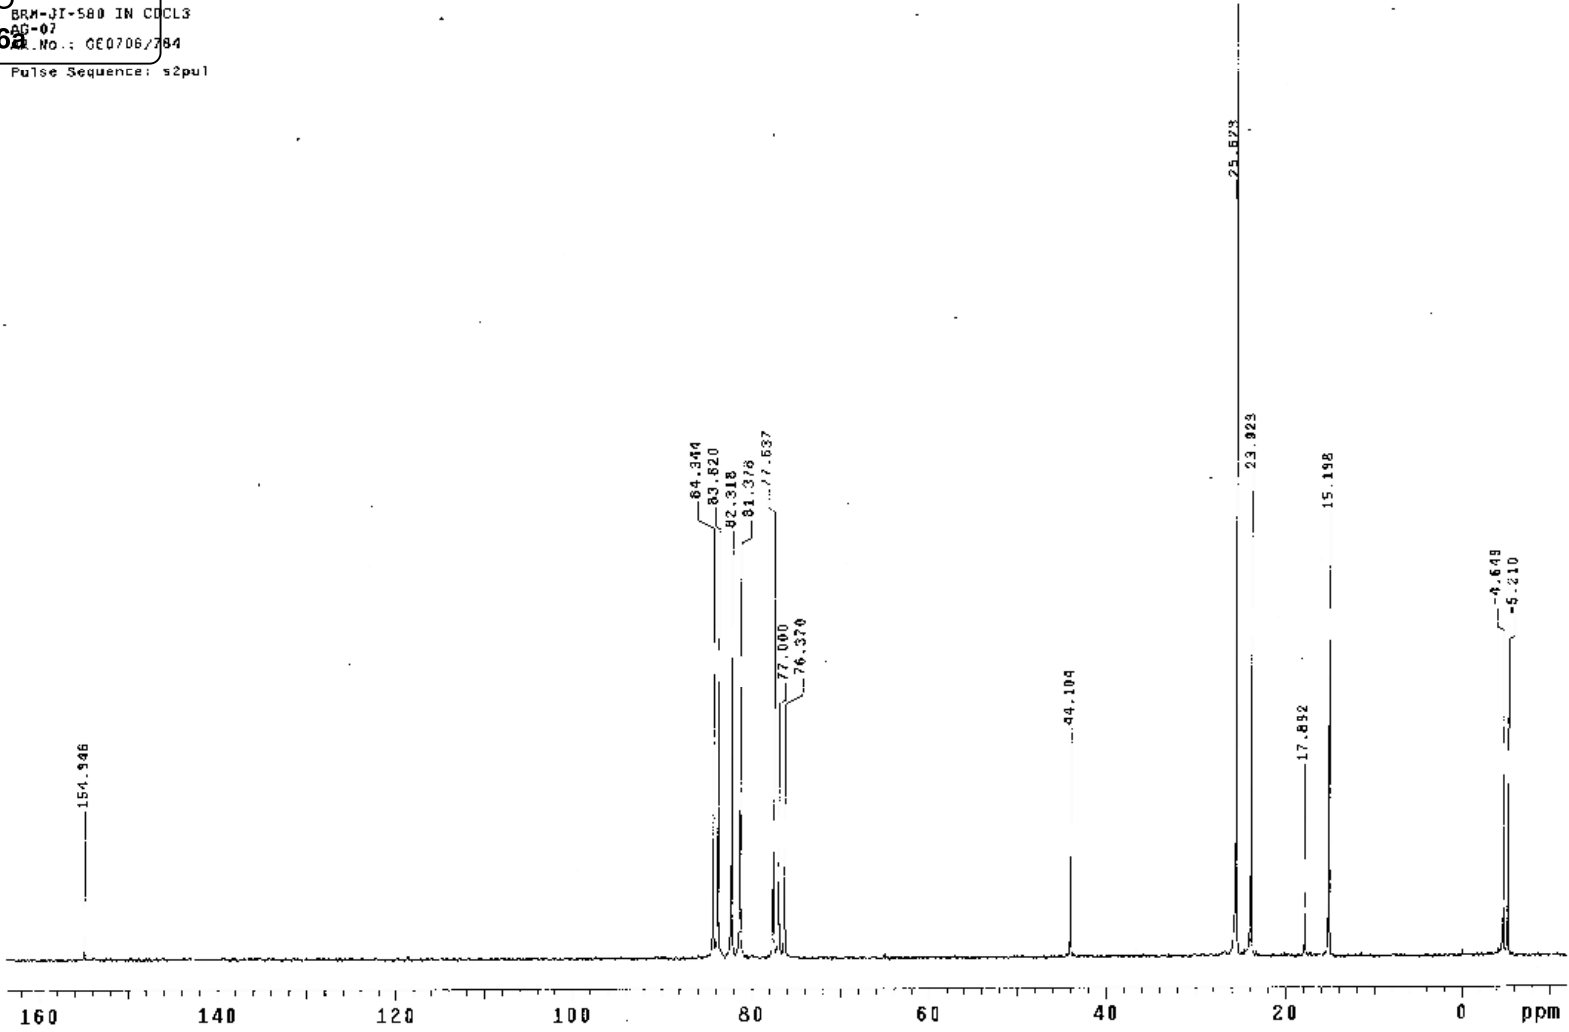

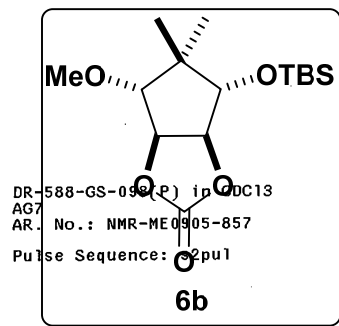

Instrument : Mercury Plus (Varian 400MHz)  
Date & Time : Wed Sep 21 14:29:19 GMT 2005  
Recorded By : Sudhakar. P

*BM*  
*21/09/05*

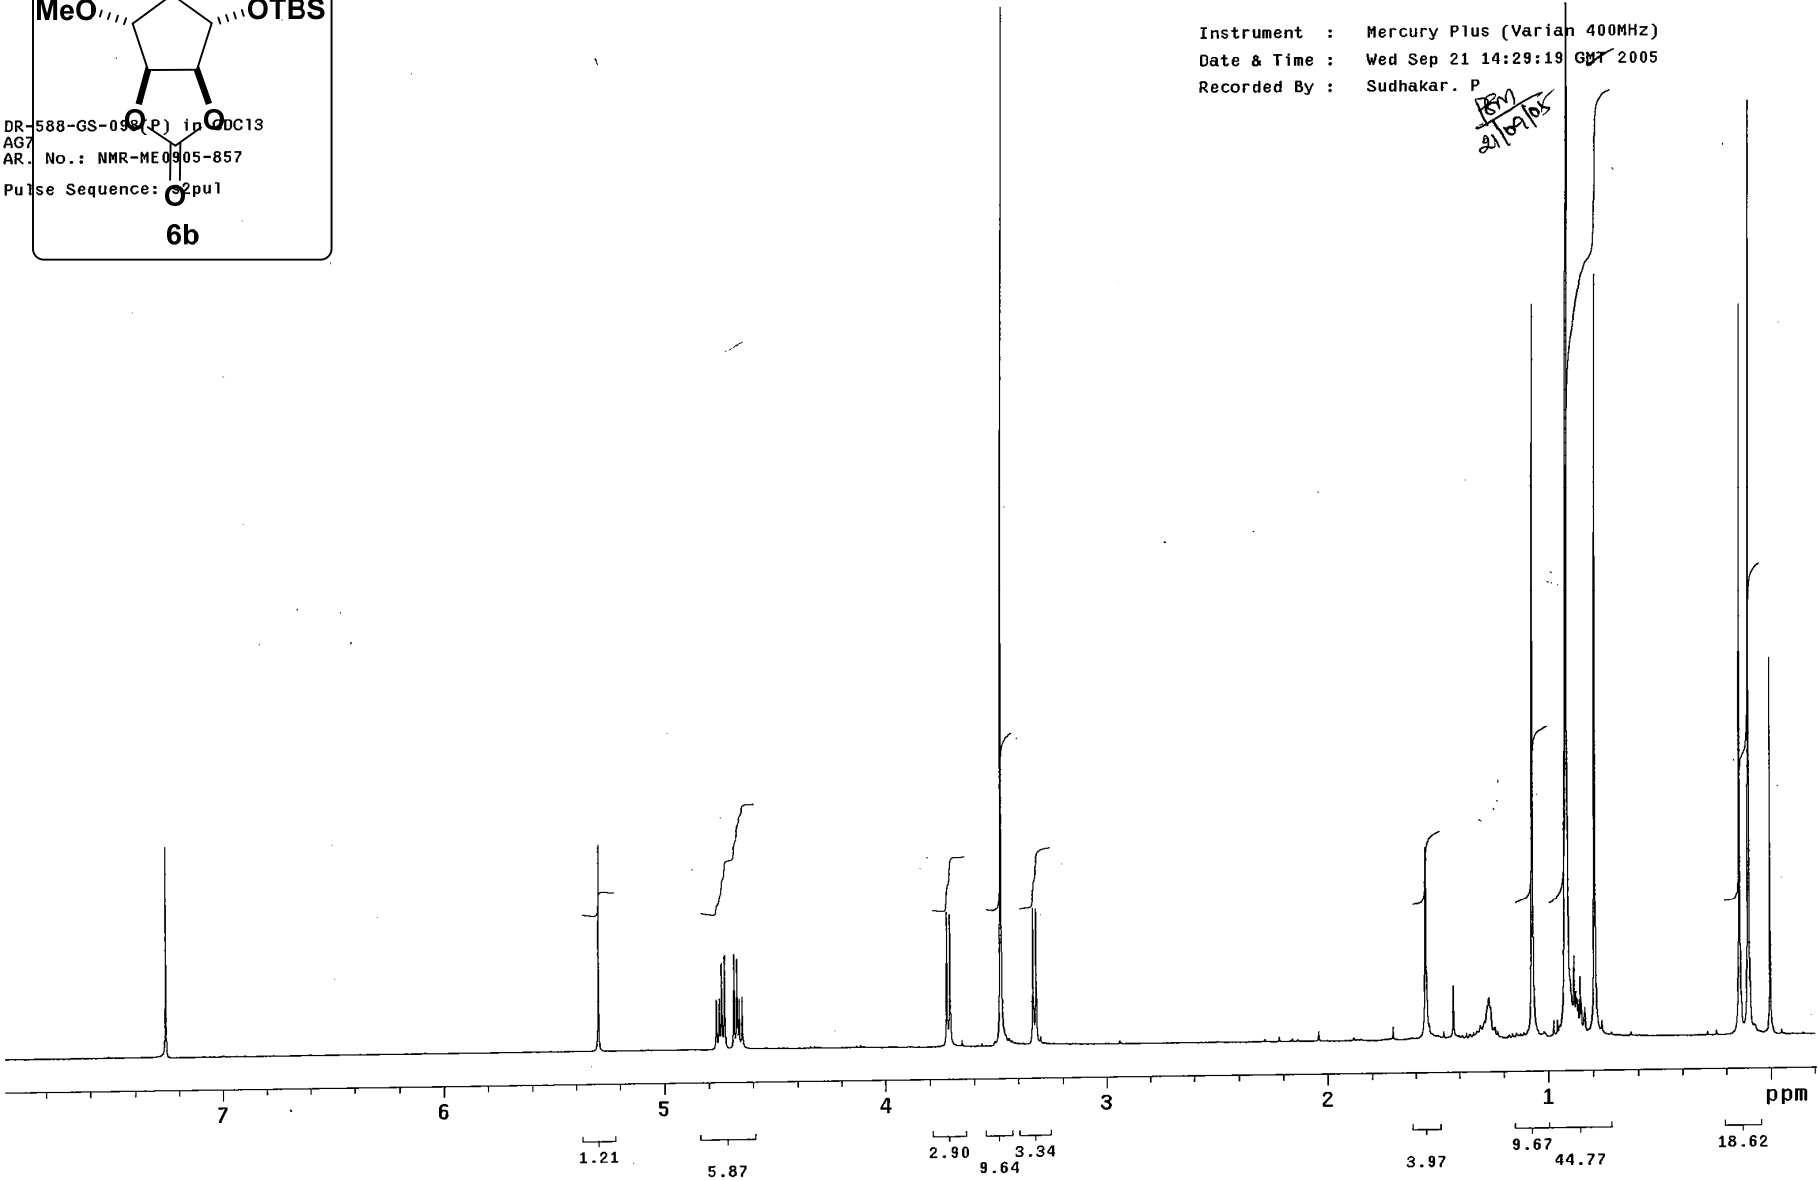

Instrument : Gemini-2000 (200MHz)  
Date & Time : Fri Oct 7 14:38:01 GMT 2005  
Recorded By : Sreekanth .B .R.

DR-588-GS-98(P) IN CDCl<sub>3</sub>  
AG-7  
AR.No:NMR\_GE1005\_230  
Pulse Sequence: s2pu1

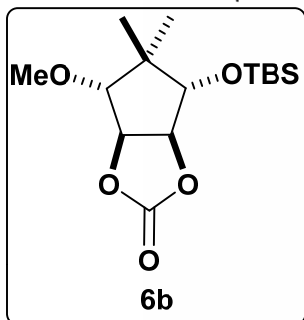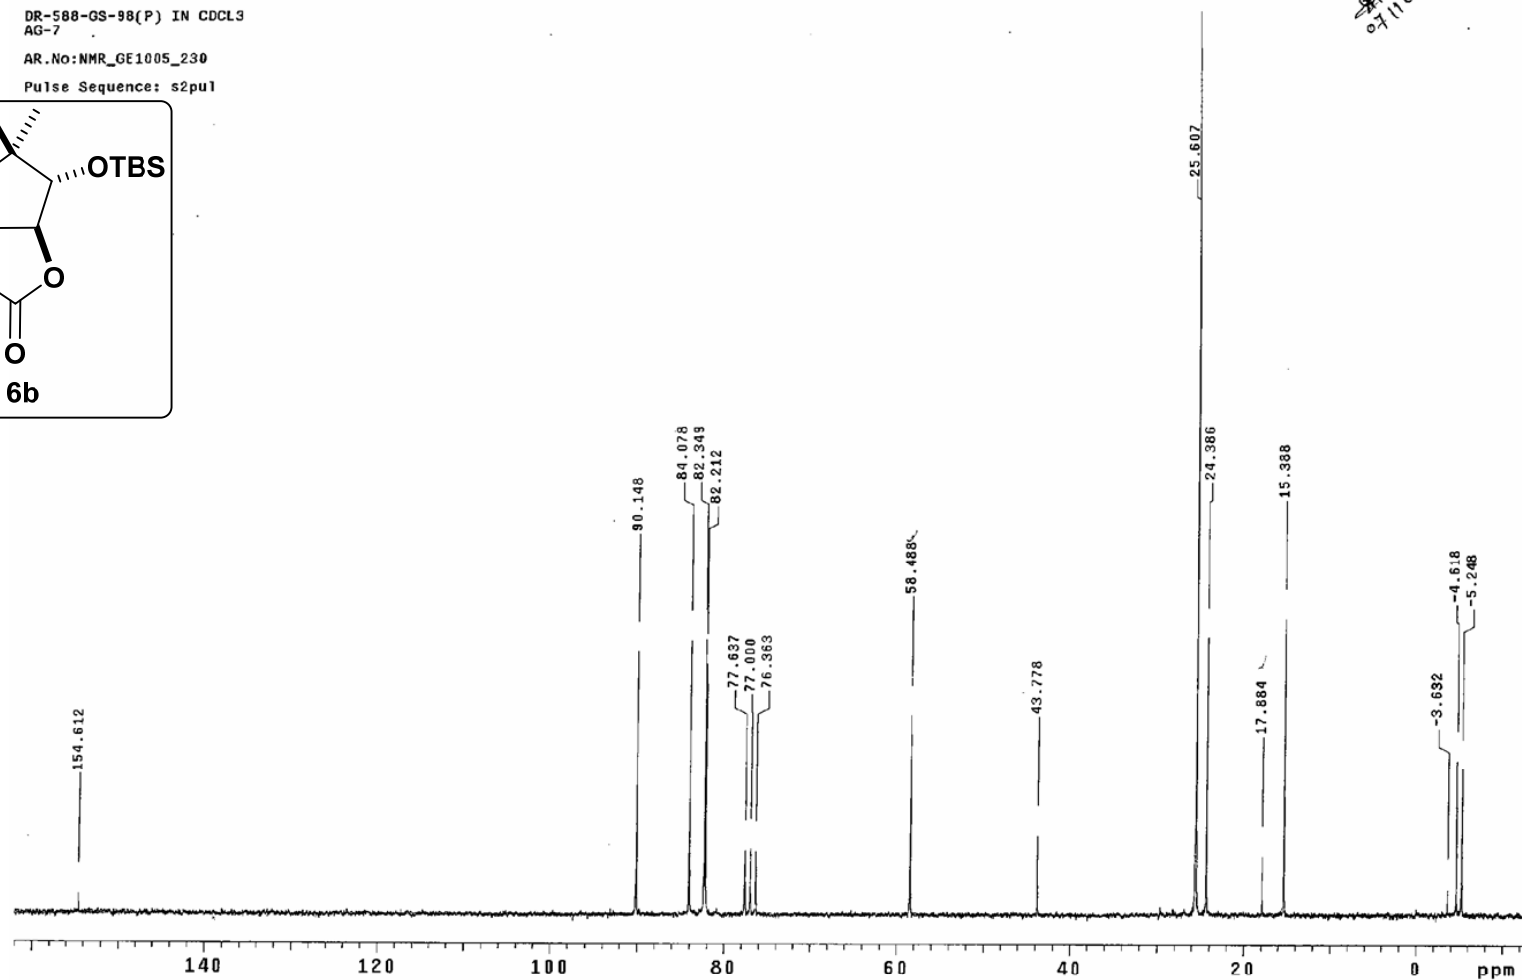

DR-588-GS-100 IN CDCL<sub>3</sub>  
D<sub>2</sub>O-EXCH  
AG-7

AR.No:NMR\_ME1005\_051

Pulse Sequence: s2pu1

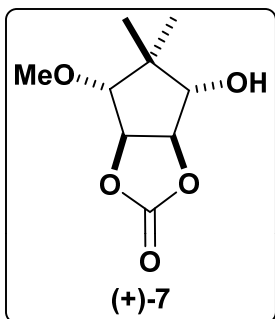

Instrument : Mercury Plus (Varian 400MHz)  
Date & Time : Mon Oct 3 19:53:57 GMT 2005  
Recorded By : Sreekanth Sharma.B

*Handwritten signature*  
21/10/12

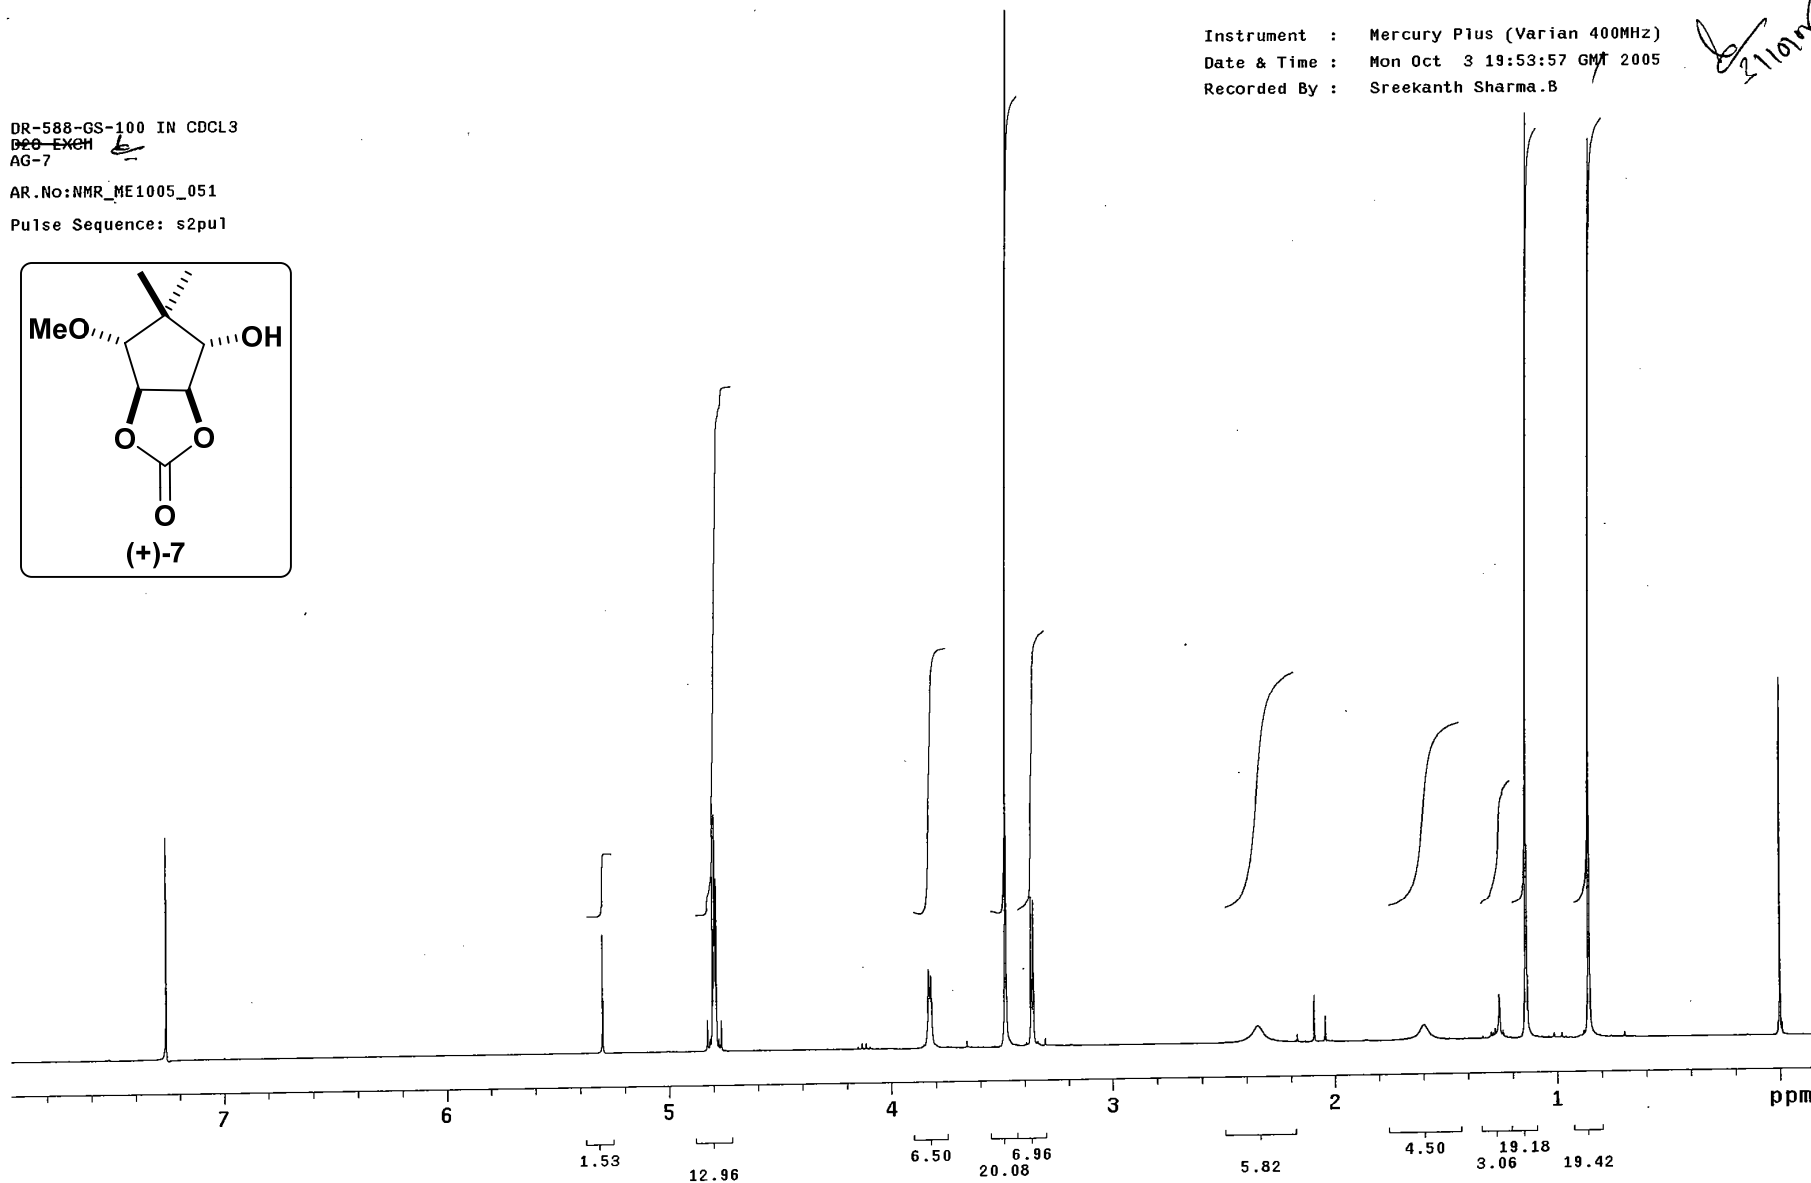



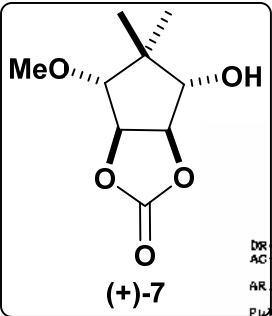

DR-588-05-143 IN CDCl<sub>3</sub>  
AC-7  
AR No: KMR\_GE1005\_005  
Pulse Sequence: zgpg30

Instrument : Gemini-2000 (200MHz)  
Date & Time : Sat Oct 1 15:08:53 CAT 2005  
Recorded By : Sreeranth .B .R

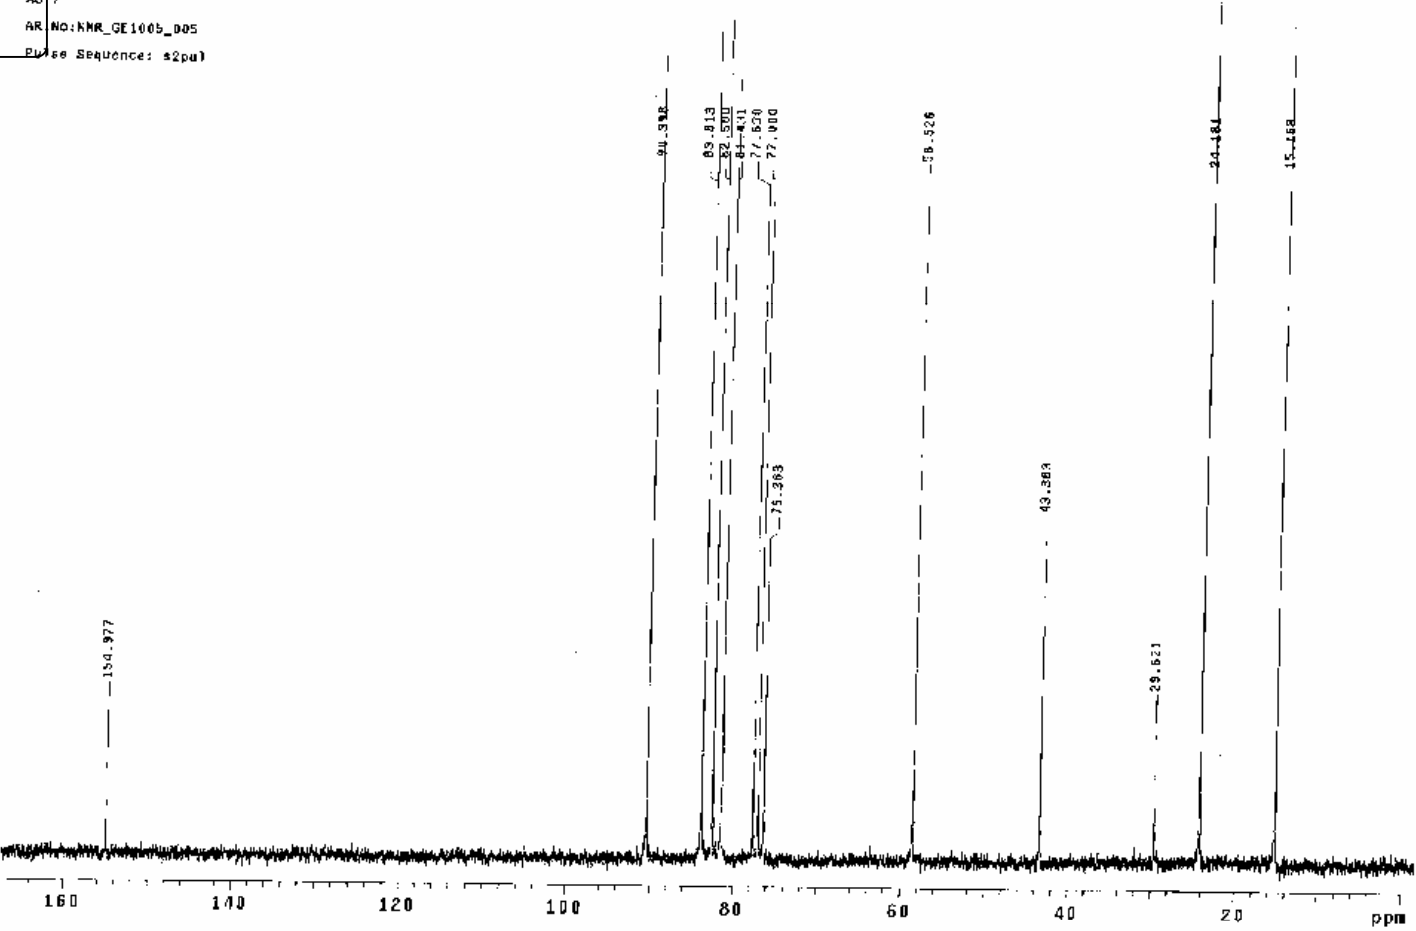

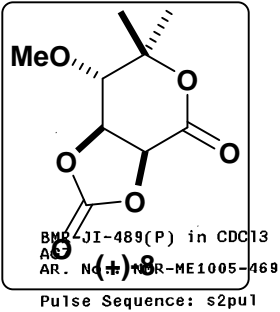

Instrument : Mercury Plus (Varian 400MHz)  
Date & Time : Tue Oct 18 14:06:02 GMT 2005  
Recorded By : Sudhakar. P

18/10/05

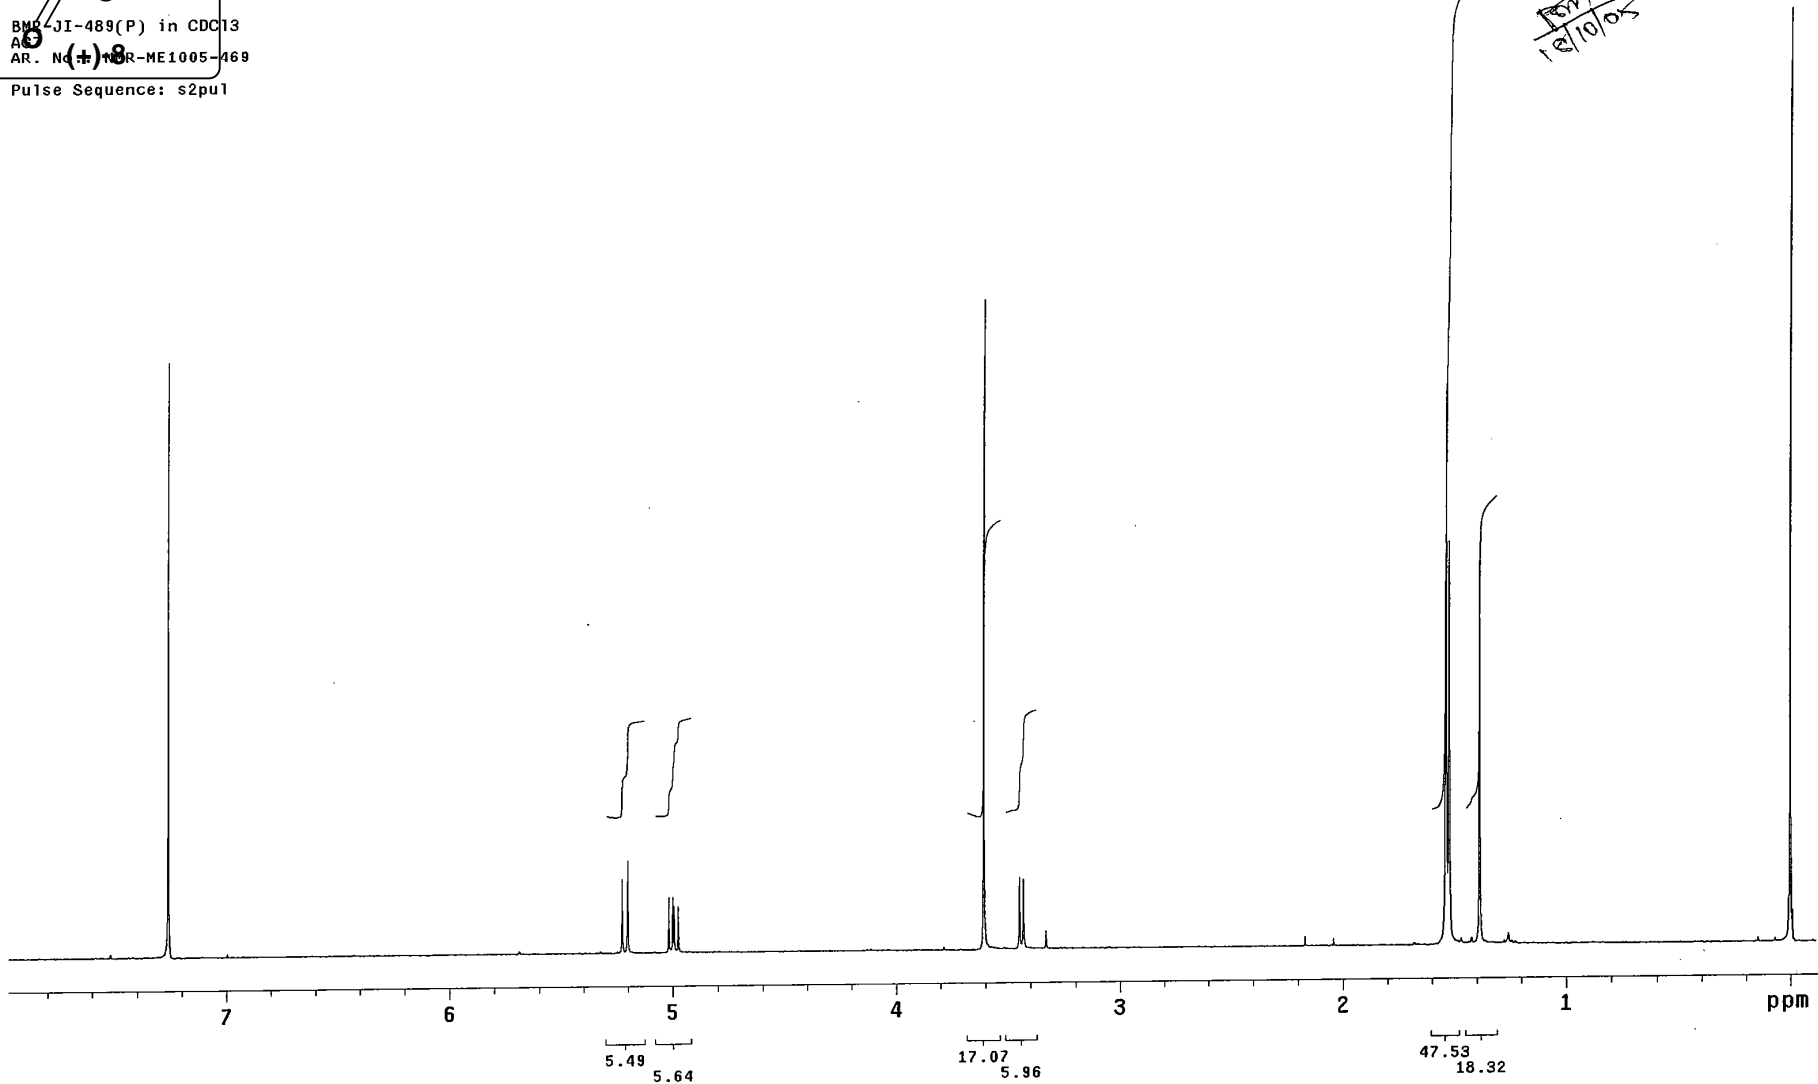

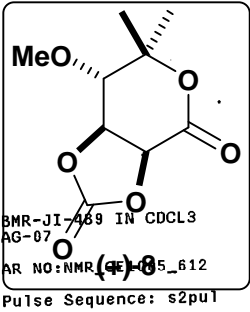

Instrument : Gemini-2000 (200MHz)  
Date & Time : Sun Oct 23 11:15:08 GMT 2005  
Recorded By : Manoj

*Handwritten signature*  
231

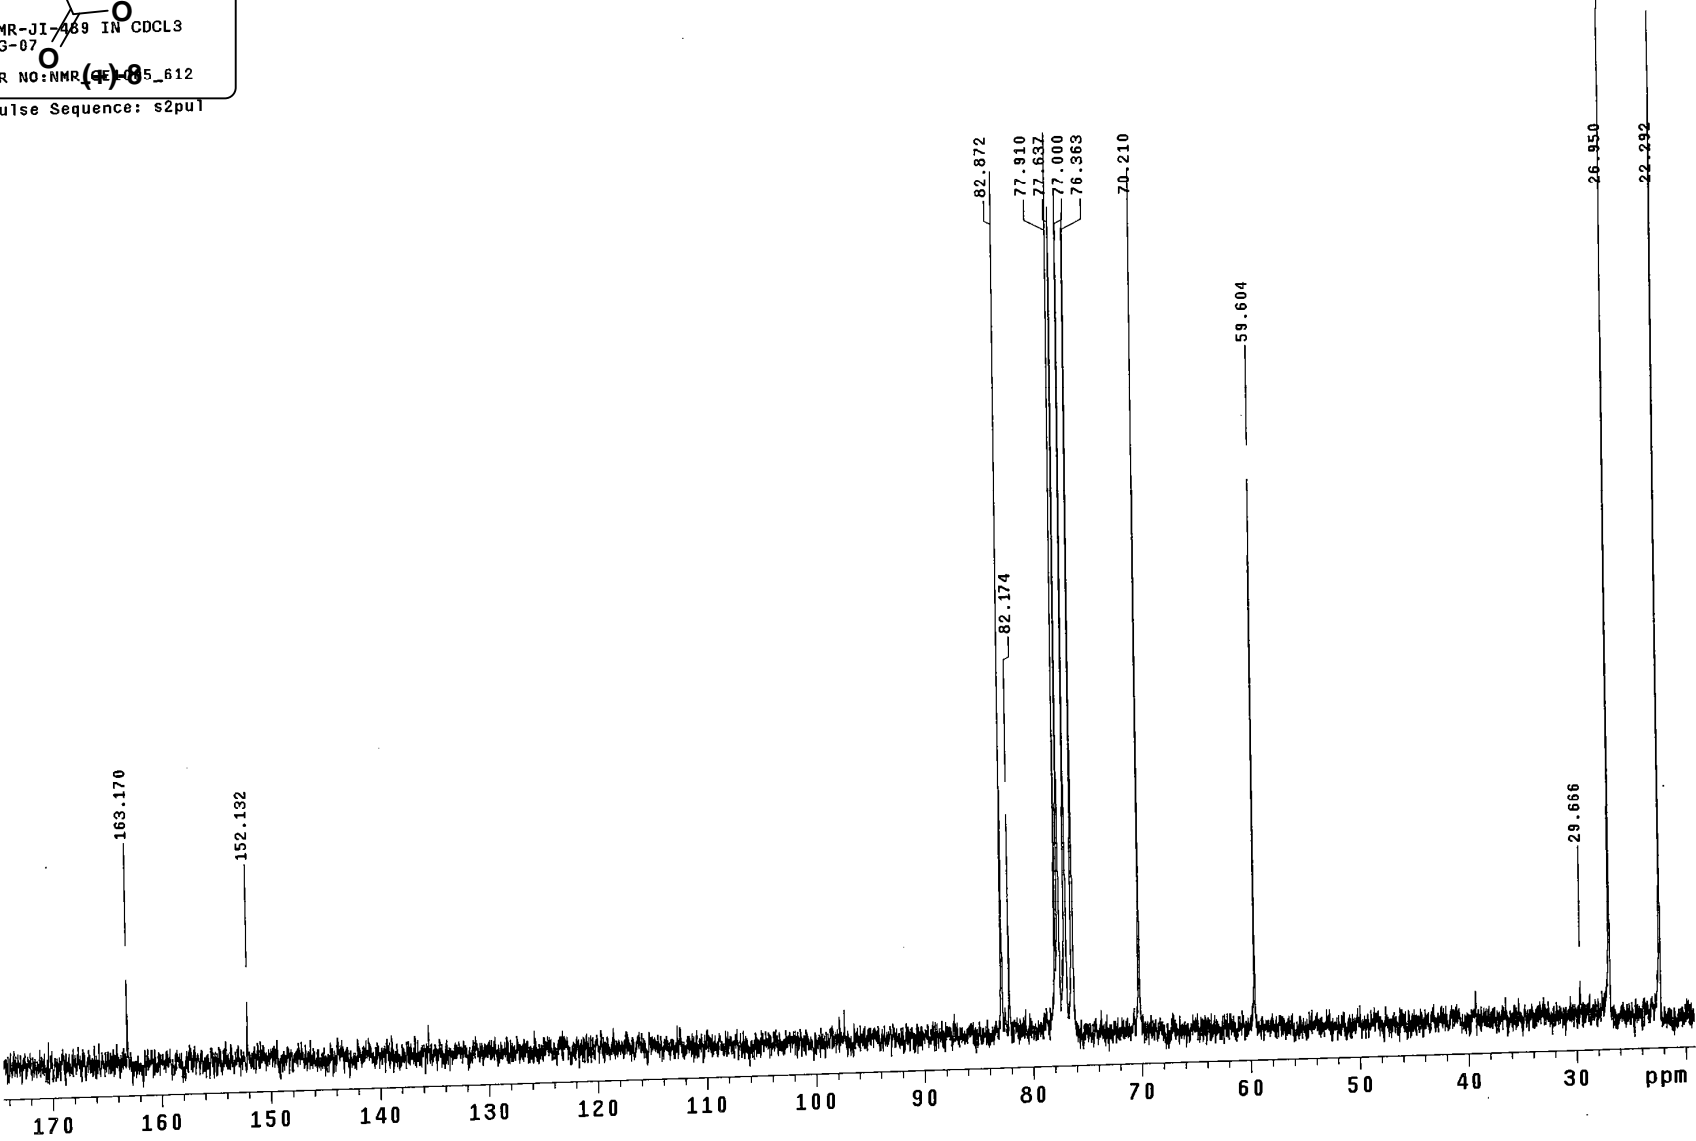

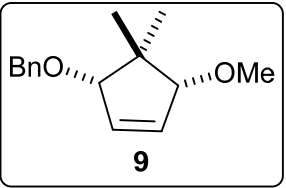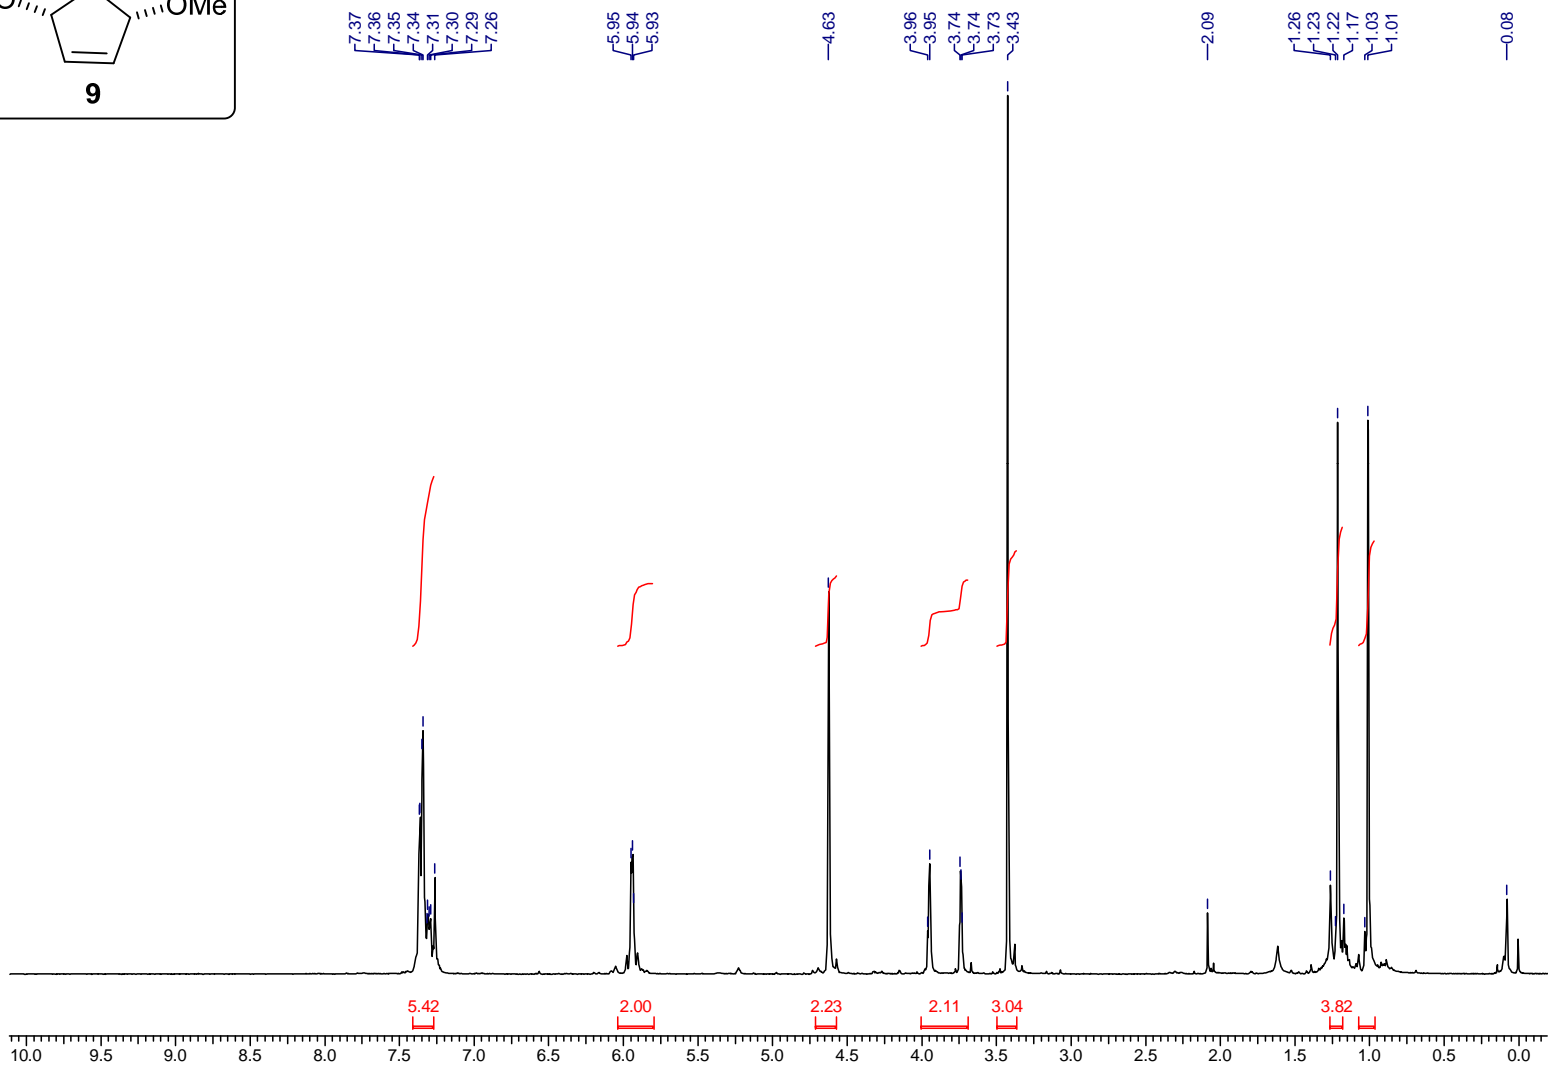

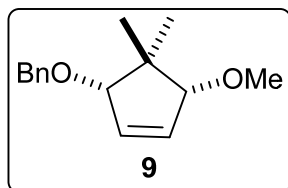

Instrument : Gemini-2000 (200MHz)  
Date & Time : Thu Feb 16 12:29:12 GMT 2006  
Recorded By : Manoj

*Manoj*  
*16/02/06*

BMR-JT-532 in CDCl<sub>3</sub>  
AQ7  
AN. No.: GE0206-695  
Pulse Sequence: s2pul

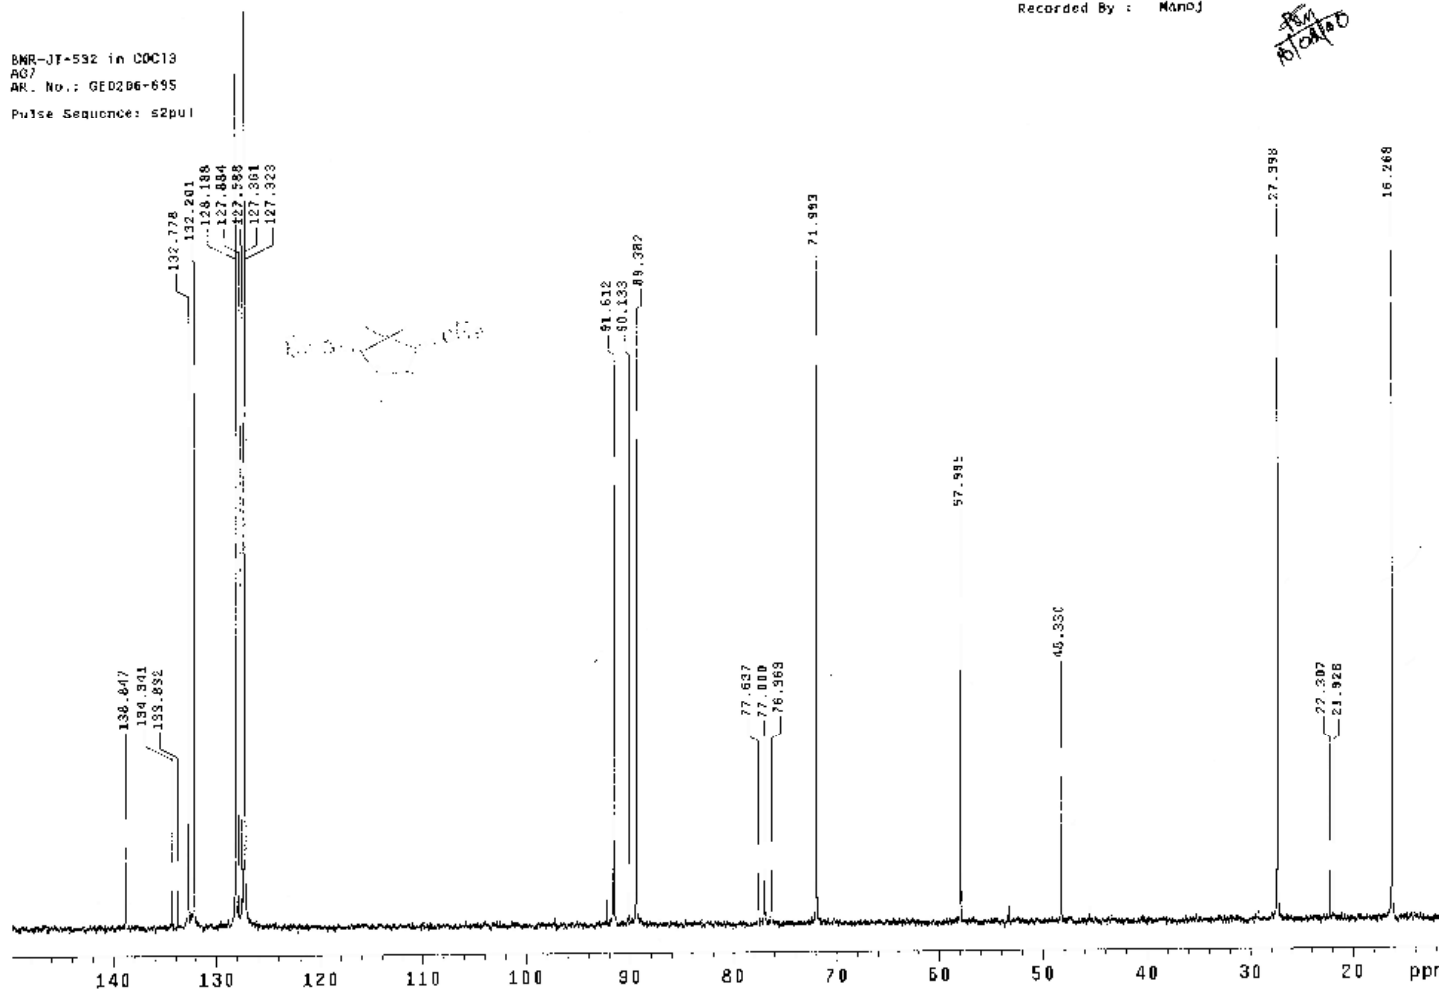

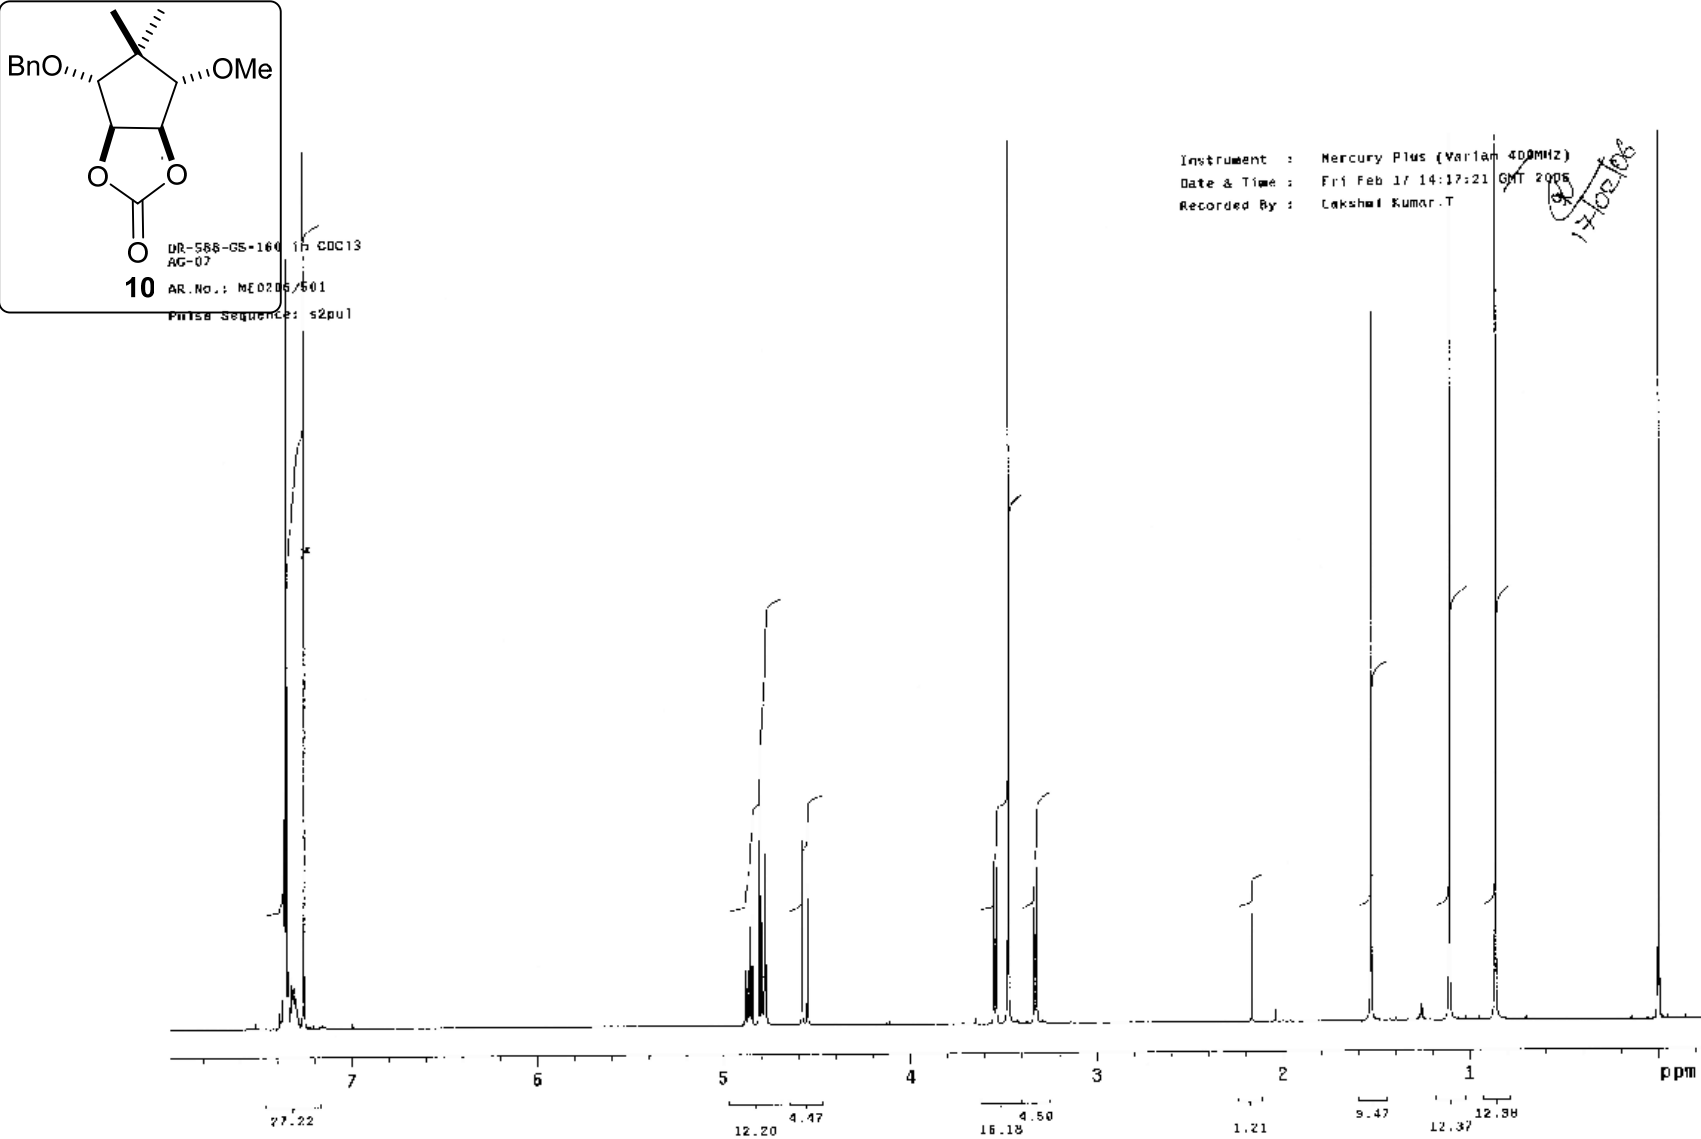

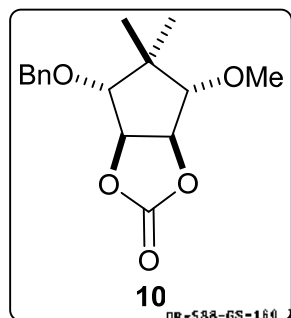

OR-588-GS-180 IN CDCl<sub>3</sub>

AG-07

AR.No.: GE0206/771

Pulse Sequence: s2pul

Instrument : Gemin1-2000 (200MHz)  
Date & Time : Fri Feb 17 21:30:40 GMT 2006  
Recorded By : Manoj

*Manoj*

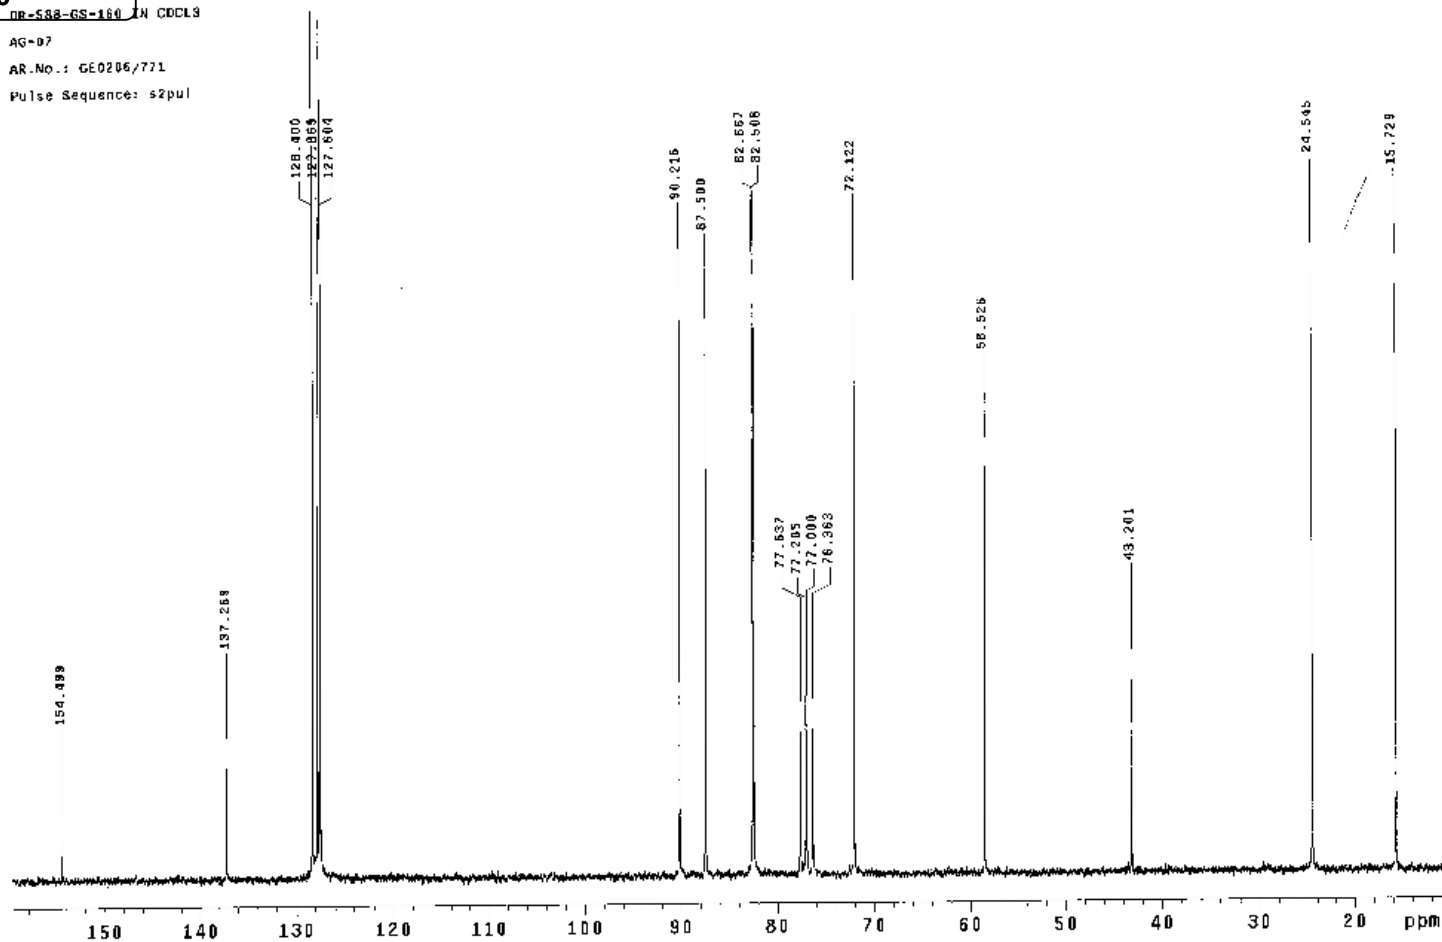

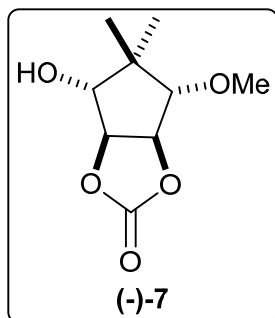

SMR-JI-536 in CDCl<sub>3</sub>  
AG-02

AK.No.: NE0266/588

Pulse Sequence: zgpg30

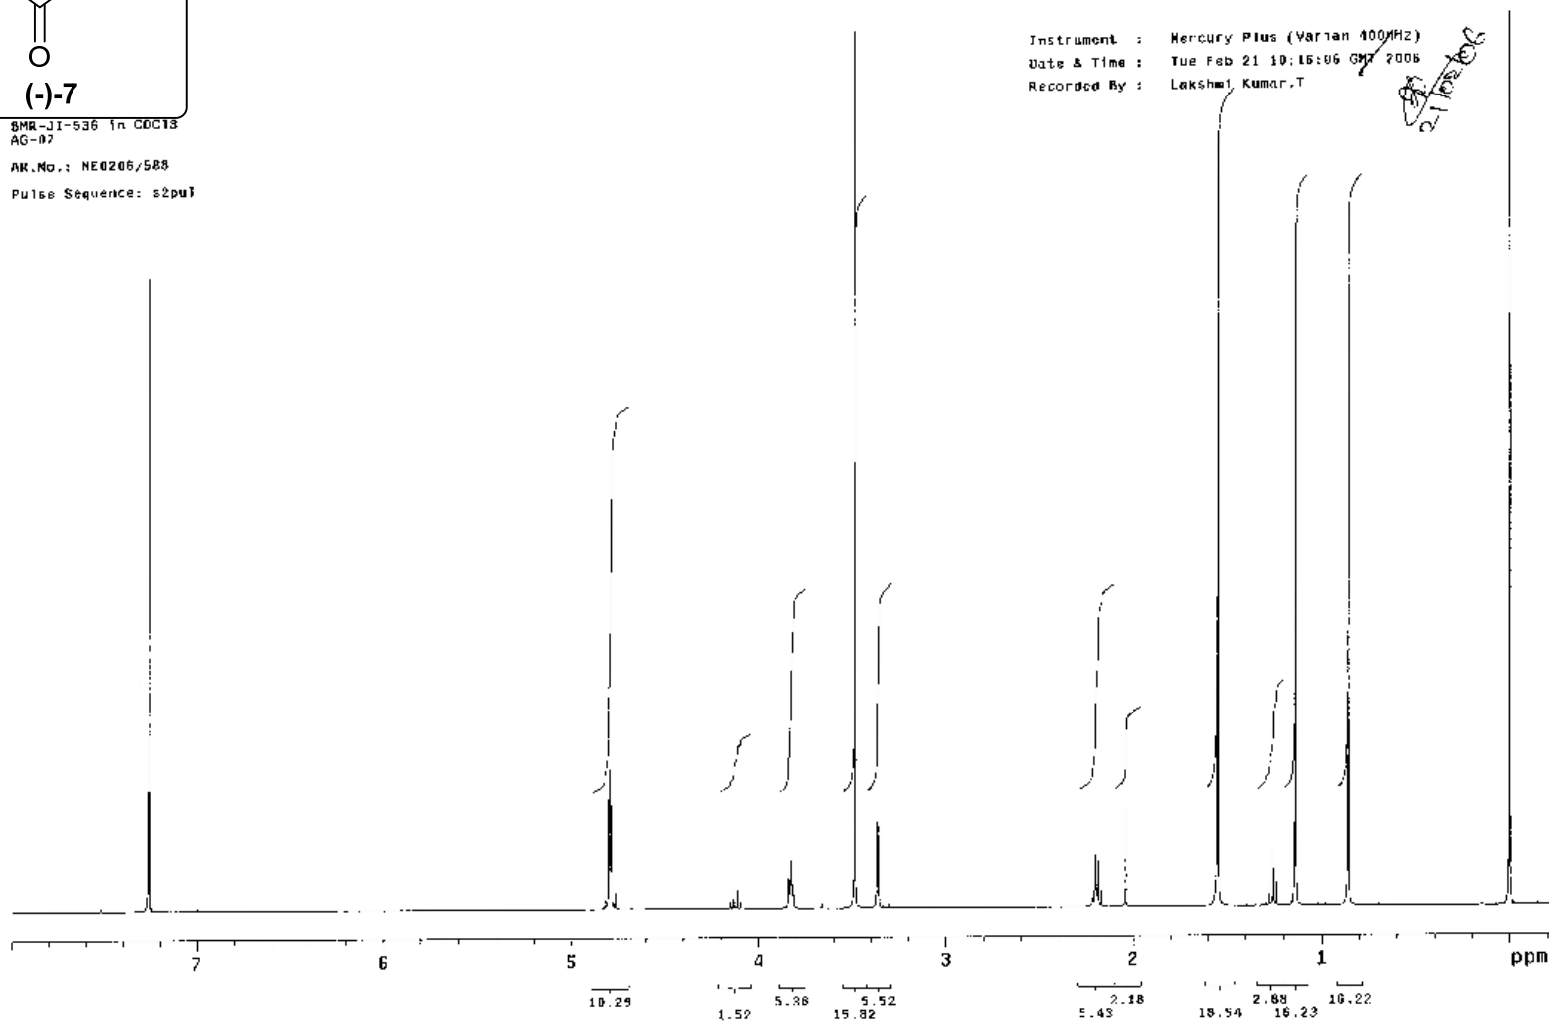



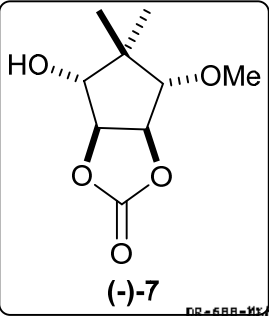

DP-688-MN-165 IN CDCl<sub>3</sub>  
AG-03  
AR NO:GE0406/233  
Pulse Sequence: g2pu1

Instrument : Gemini-2000 (200MHz)  
Date & Time : Mon Apr 10 09:13:43 AM 2006  
Recorded By : Manoj

for  
2006106

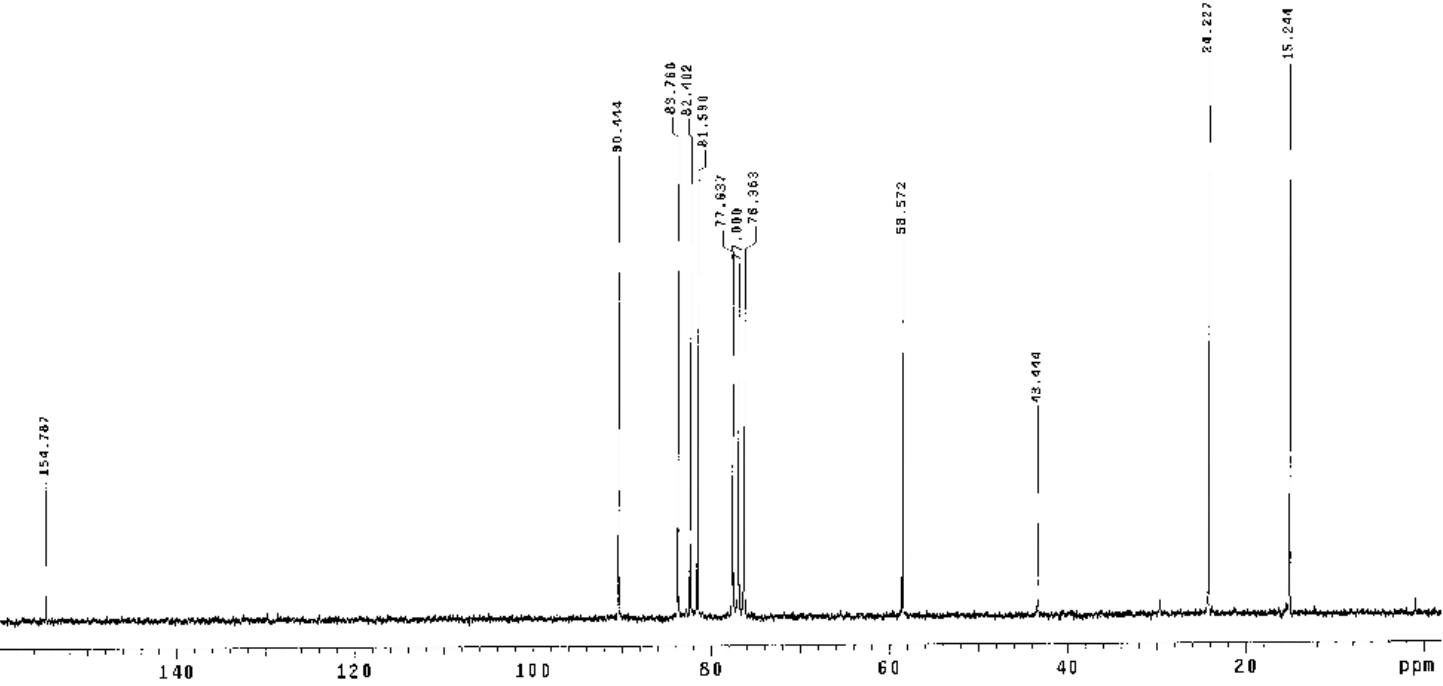

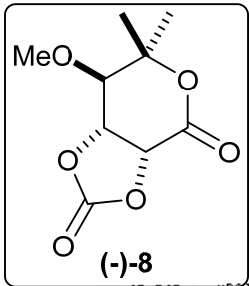

BMK-07-545 in CDCl<sub>3</sub>  
AG-07

AR.No.: HE0306/405

Pulse Sequence: zgpg30

Instrument : Mercury Plus (Varian 400MHz)  
Date & Time : Fri Mar 10 15:53:30 GMT 2005  
Recorded By : Lakshmi Kumar.T

10.60123

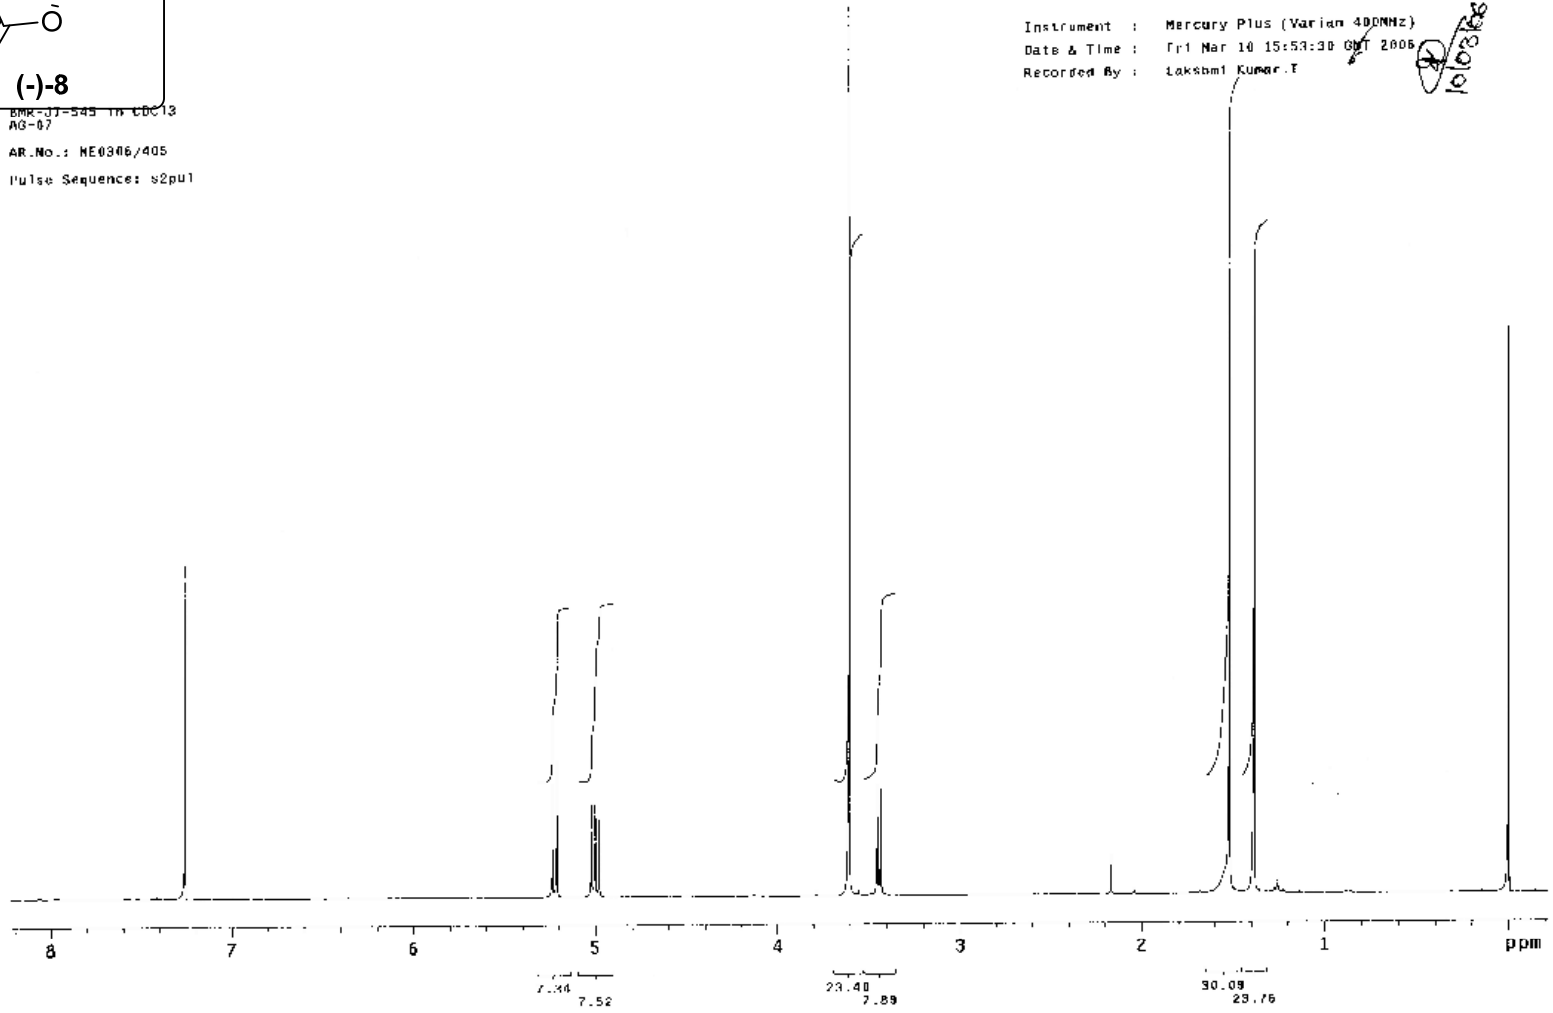

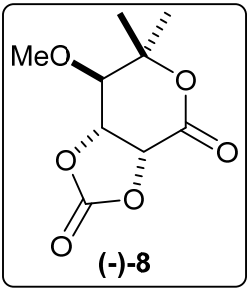

BNR-JI-545 IN CDCl<sub>3</sub>  
AQ-07  
AR NO: GE0306/976  
Pulse Sequence: zgpg30

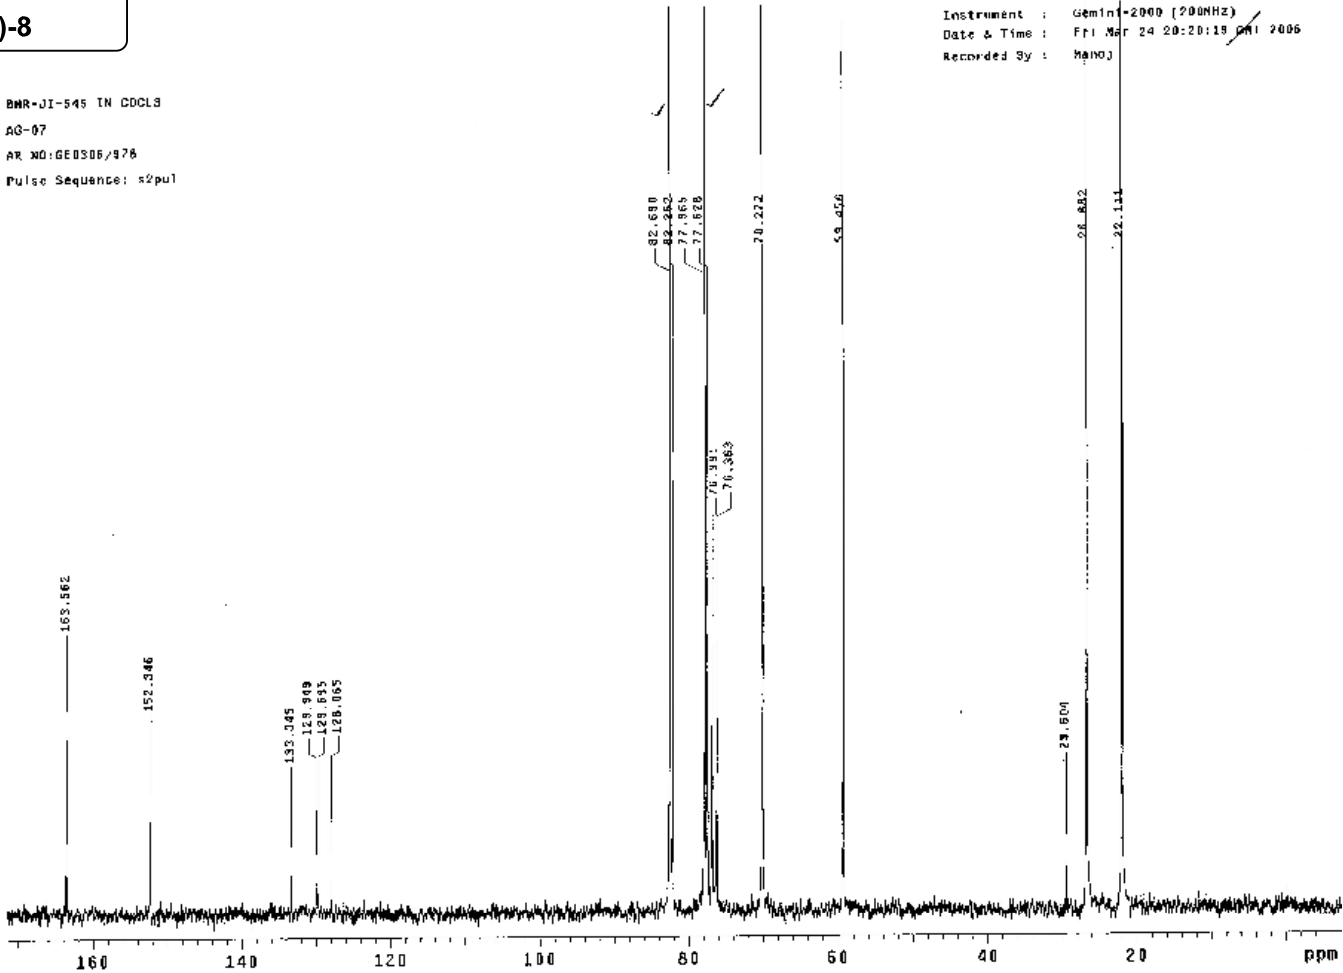

Supplement: c3ra42891e.pdf [file c3ra42891e.pdf]
